# Supplementary material
Source: publisher figshare collection journal article supplement (https://acs.figshare.com/ndownloader/files/4580251)
Supplement: Supplementary file 1 [file 4580251]

## Sheet: Total Sites
Table S1. Identification of 590 N-glycosylation sites on cell-surface proteins in GalNAz labeling experiments
UniProt name	Gene symbol	Site	ModScore	Sequence	XCorr	ppm	Obs m/z	z	ID_in_Expt#1	ID_in_Expt#2	Annotation
Q9Y4L1	HYOU1	515	1000	R.VFGSQN#LTTVK.L	2.747	-3.57	598.822	2	Y	Y	Hypoxia up-regulated protein 1
Q86VR7	VSIG10L	144	1000	K.TPASN#ISTQVSHTK.L	2.93	-3.51	737.373	2	Y	N	V-set and immunoglobulin domain-containing protein 10-like
Q96F46	IL17RA	49	1000	R.ALVCSQPGLN#CTVK.N	3.126	-3.5	775.381	2	Y	Y	Interleukin-17 receptor A
Q03167	TGFBR3	492	1000	K.MN#GTHFVLESPLN#GCGTRPR.W	2.689	-3.12	750.355	3	Y	Y	Transforming growth factor beta receptor type 3
Q03167	TGFBR3	503	1000	K.MN#GTHFVLESPLN#GCGTRPR.W	2.689	-3.12	750.355	3	Y	Y	Transforming growth factor beta receptor type 3
P02787	TF	630	65.246	R.QQQHLFGSN#VTDCSGNFCLFR.S	3.175	-3.08	840.04	3	N	Y	Serotransferrin
P07306	ASGR1	79	1000	R.GLRETFSN#FTASTEAQVK.G	3.059	-3.03	663.663	3	Y	Y	Asialoglycoprotein receptor 1
P05387	RPLP2	15	1000	R.YVASYLLAALGGN#SSPSAK.D	4.933	-2.98	936.483	2	Y	N	60S acidic ribosomal protein P2
Q9UHN6	TMEM2	292	1000	R.FDTHEYRN#ESRR.L	2.597	-2.91	538.248	3	Y	Y	Transmembrane protein 2
P01009	SERPINA1	70	12.431	R.QLAHQSN#STNIFFSPVSIATAFAM*LSLGTK.A	3.465	-2.89	1067.54	3	Y	Y	Alpha-1-antitrypsin
Q9UHN6	TMEM2	1234	1000	R.GDPSVISVN#GTDFTFR.S	2.669	-2.83	857.91	2	Y	Y	Transmembrane protein 2
P11047	LAMC1	1175	17.009	K.VAAAN#VSVTQPESTGDPNN#MTLLAEEARK.L	4.084	-2.71	1007.16	3	N	Y	Laminin subunit gamma-1
Q9H6E4	CCDC134	148	10.468	R.WGISFCN#QTGVFNQGPHSPILSLMAQELGISEK.D	4.678	-2.63	1216.93	3	N	Y	Coiled-coil domain-containing protein 134
P21589	NT5E	410	8.463	R.SPIDERNNGTITWEN#LAAVLPFGGTFDLVQLK.G	3.717	-2.44	1173.6	3	N	Y	5'-nucleotidase
P08581	MET	202	44.973	K.DRFINFFVGNTIN#SSYFPDHPLHSISVR.R	4.394	-2.43	821.409	4	Y	Y	Hepatocyte growth factor receptor
P11047	LAMC1	1223	60.358	R.TLAGEN#QTAFEIEELNRK.Y	3.132	-2.38	1033.52	2	N	Y	Laminin subunit gamma-1
P15144	ANPEP	319	39.848	R.IWARPSAIAAGHGDYALN#VTGPILNFFAGHYDTPYPLPK.S	5.656	-2.25	1054.29	4	Y	Y	Aminopeptidase N
P11279	LAMP1	121	1000	R.YSVQLM*SFVYN#LSDTHLFPN#ASSK.E	3.566	-2.2	924.105	3	Y	Y	Lysosome-associated membrane glycoprotein 1
P11279	LAMP1	130	1000	R.YSVQLM*SFVYN#LSDTHLFPN#ASSK.E	3.566	-2.2	924.105	3	Y	Y	Lysosome-associated membrane glycoprotein 1
P28827	PTPRM	448	4.856	R.EEVSWDTENSHPQHTITN#LSPYTN#VSVKLILM*NPEGRK.E	3.394	-2.17	878.031	5	Y	N	Receptor-type tyrosine-protein phosphatase mu
P28827	PTPRM	454	5.706	R.EEVSWDTENSHPQHTITN#LSPYTN#VSVKLILM*NPEGRK.E	3.394	-2.17	878.031	5	Y	N	Receptor-type tyrosine-protein phosphatase mu
Q969N2	PIGT	164	12.666	K.ELSNVLSGIFCASLNFIDSTNTVTPTASFKPLGLAN#DTDHYFLR.Y	4.531	-2.1	1213.1	4	N	Y	GPI transamidase component PIG-T
P19440	GGT1	120	1000	R.LAFATMFN#SSEQSQK.G	3.667	-1.85	846.394	2	Y	Y	Gamma-glutamyltranspeptidase 1
O60637	TSPAN3	127	37.54	K.TYN#GTNPDAASR.A	2.167	-1.74	635.282	2	N	Y	Tetraspanin-3
O14656	TOR1A	143	8.998	K.IIAENIYEGGLNSDYVHLFVATLHFPHASN#ITLYK.D	4.35	-1.71	793.409	5	Y	N	Torsin-1A
P56199	ITGA1	217	42.565	K.QTQVGIVQYGEN#VTHEFNLNK.Y	4.408	-1.7	1211.1	2	Y	Y	Integrin alpha-1
P13473	LAMP2	75	133.582	K.TVTISDHGTVTYN#GSICGDDQNGPK.I	4.662	-1.68	880.396	3	Y	Y	Lysosome-associated membrane glycoprotein 2
O60487	MPZL2	118	1000	K.LQFDDN#GTYTCQVK.N	3.642	-1.68	846.376	2	Y	Y	Myelin protein zero-like protein 2
Q5ZPR3	CD276	215	1000	R.VVLGAN#GTYSCLVR.N	2.994	-1.66	756.391	2	Y	Y	CD276 antigen
Q92823	NRCAM	276	45.026	R.ERPPTFLTPEGN#ASNKEELR.G	4.348	-1.66	763.384	3	Y	Y	Neuronal cell adhesion molecule
P10253	GAA	233	1000	R.VLLN#TTVAPLFFADQFLQLSTSLPSQYITGLAEHLSPLM*LSTSWTR.I	3.851	-1.64	1282.42	4	Y	Y	Lysosomal alpha-glucosidase
O95477	ABCA1	244	1000	R.TLN#STSPFPSK.E	2.203	-1.58	591.299	2	N	Y	ATP-binding cassette sub-family A member 1
P42892	ECE1	316	1000	K.LLGGGDEEAIRPQMQQILDFETALAN#ITIPQEK.R	3.655	-1.56	1214.62	3	Y	Y	Endothelin-converting enzyme 1
Q8TEM1	NUP210	926	1000	R.EGSGYFFLN#TSTADVVK.V	3.832	-1.55	919.439	2	Y	N	Nuclear pore membrane glycoprotein 210
Q9Y5L3	ENTPD2	129	37.54	R.LLN#LTNPEASTSVLMAVTHTLTQYPFDFR.G	3.719	-1.54	1094.89	3	Y	N	Ectonucleoside triphosphate diphosphohydrolase 2
Q92508	PIEZO1	2331	1000	K.HMLALAPN#STAR.R	2.482	-1.54	642.833	2	Y	N	Piezo-type mechanosensitive ion channel component 1
Q9UHN6	TMEM2	248	1000	R.TLN#SSGLPFGSYTFEK.D	3.582	-1.54	875.923	2	Y	Y	Transmembrane protein 2
P17301	ITGA2	112	1000	K.TN#MSLGLILTR.N	3.17	-1.53	611.341	2	Y	Y	Integrin alpha-2
Q14517	FAT1	2325	16.173	R.ATDSDSEPNRGISYQMFGN#HSK.S	2.733	-1.5	611.771	4	N	Y	Protocadherin Fat 1
P56199	ITGA1	317	5.085	R.FSIAILGSYNRGN#LSTEK.F	3.9	-1.5	987.013	2	N	Y	Integrin alpha-1
Q92859	NEO1	73	1000	R.GSSVILN#CSAYSEPSPK.I	3.391	-1.49	899.923	2	N	Y	Neogenin
Q04771	ACVR1	100	5.085	K.TPPSPGQAVECCQGDWCN#RNITAQLPTK.G	3.504	-1.45	1063.48	3	Y	N	Activin receptor type-1
P05556	ITGB1	363	3.696	K.SAVGTLSAN#SSNVIQLIIDAYNSLSSEVILENGK.L	4.289	-1.45	1170.61	3	Y	Y	Integrin beta-1
P05107	ITGB2	116	1000	K.VTLYLRPGQAAAFN#VTFR.R	3.28	-1.44	676.369	3	Y	N	Integrin beta-2
P17301	ITGA2	432	1000	K.QAFDQILQDRN#HSSYLGYSVAAISTGESTHFVAGAPR.A	4.444	-1.38	999.988	4	Y	N	Integrin alpha-2
P15586	GNS	183	146.622	K.YYN#YTLSINGK.A	3.348	-1.37	669.826	2	Y	Y	N-acetylglucosamine-6-sulfatase
Q14517	FAT1	3640	1000	R.QVTQEMLN#HTIAIR.F	2.624	-1.36	828.934	2	Y	N	Protocadherin Fat 1
Q9ULF5	SLC39A10	339	95.523	K.DLNEDDHHHECLN#VTQLLK.Y	3.24	-1.35	778.361	3	Y	Y	Zinc transporter ZIP10
P42785	PRCP	326	6.931	K.NPNVSDSLLLQN#IFQALNVYYN#YSGQVK.C	4.665	-1.34	1069.87	3	Y	N	Lysosomal Pro-X carboxypeptidase
P52798	EFNA4	33	24.243	R.HVVYWN#SSNPR.L	1.995	-1.32	681.327	2	Y	N	Ephrin-A4
Q12907	LMAN2	183	0	R.VFPYISVMVNN#GSLSYDHSK.D	4.052	-1.3	1130.54	2	N	Y	Vesicular integral-membrane protein VIP36
P28300	LOX	81	1000	R.RRDPGAAVPGAAN#ASAQQPR.T	2.92	-1.3	665.011	3	Y	N	Protein-lysine 6-oxidase
P13987	CD59	43	1000	K.TAVN#CSSDFDACLITK.A	4.207	-1.29	902.901	2	N	Y	CD59 glycoprotein
P02763	ORM1	98	4.988	R.QDQCIYN#TTYLN#VQRENGTISR.Y	2.669	-1.29	893.752	3	N	Y	Alpha-1-acid glycoprotein 1
Q13433	SLC39A6	283	6.294	K.LLTSHGMGIQVPLN#ATEFNYLCPAIINQIDAR.S	4.014	-1.28	893.957	4	Y	N	Zinc transporter ZIP6
Q14118	DAG1	641	1000	K.KLAFAFGDRN#CSTITLQN#ITR.G	2.684	-1.22	608.814	4	Y	Y	Dystroglycan
Q14118	DAG1	649	1000	K.KLAFAFGDRN#CSTITLQN#ITR.G	2.684	-1.22	608.814	4	Y	Y	Dystroglycan
P02763	ORM1	72	1000	K.SVQEIQATFFYFTPN#KTEDTIFLR.E	2.85	-1.21	966.819	3	Y	Y	Alpha-1-acid glycoprotein 1
P01023	A2M	1424	1000	K.VSN#QTLSLFFTVLQDVPVR.D	4.609	-1.2	1083.59	2	Y	N	Alpha-2-macroglobulin
P42892	ECE1	187	1000	R.ACM*N#ETRIEELR.A	1.915	-1.2	514.237	3	N	Y	Endothelin-converting enzyme 1
P78536	ADAM17	594	35.777	K.CIPFCEREQQLESCACN#ETDNSCK.V	3.377	-1.19	1013.4	3	Y	Y	Disintegrin and metalloproteinase domain-containing protein 17
Q9Y5L3	ENTPD2	446	1.728	K.KAADTAVGWALGYMLNLTN#LIPADPPGLRK.G	4.056	-1.19	793.179	4	Y	N	Ectonucleoside triphosphate diphosphohydrolase 2
P17301	ITGA2	460	109.11	R.AN#YTGQIVLYSVNENGN#ITVIQAHR.G	3.756	-1.19	927.47	3	N	Y	Integrin alpha-2
P17301	ITGA2	475	4.085	R.AN#YTGQIVLYSVNENGN#ITVIQAHR.G	3.756	-1.19	927.47	3	N	Y	Integrin alpha-2
O15230	LAMA5	921	1000	R.LN#LTSPDLFWLVFR.Y	3.174	-1.17	862.468	2	N	Y	Laminin subunit alpha-5
Q9Y4D7	PLXND1	736	1000	R.TAQVYPHTACTSCLSAQWPCFWCSQQHSCVSN#QSR.C	5.525	-1.14	1058.95	4	Y	Y	Plexin-D1
Q9Y4L1	HYOU1	931	1000	R.AEPPLN#ASASDQGEK.V	2.078	-1.13	758.853	2	Y	Y	Hypoxia up-regulated protein 1
P18084	ITGB5	477	1000	R.CN#GSGTYVCGLCECSPGYLGTR.C	3.283	-1.13	824.337	3	Y	N	Integrin beta-5
Q9Y4D7	PLXND1	500	48.874	K.INLN#ESMQVVSR.R	3.124	-1.09	696.855	2	Y	N	Plexin-D1
P42785	PRCP	317	0	K.NPN#VSDSLLLQNIFQALNVYYN#YSGQVK.C	6.384	-1.06	1069.87	3	N	Y	Lysosomal Pro-X carboxypeptidase
Q4G148	GXYLT1	278	64.398	K.TGVNSGVMLMN#MTR.M	3.436	-1.03	757.356	2	Y	N	Glucoside xylosyltransferase 1
Q14517	FAT1	2464	1000	R.HALKPFYSLN#LSVSDGVFR.S	3.429	-1.02	718.38	3	Y	Y	Protocadherin Fat 1
P23284	PPIB	148	1000	K.DTN#GSQFFITTVK.T	2.535	-1.02	730.861	2	Y	N	Peptidyl-prolyl cis-trans isomerase B
P43308	SSR2	104	1000	K.AGYFN#FTSATITYLAQEDGPVVIGSTSAPGQGGILAQR.E	4.541	-1.02	965.985	4	Y	Y	Translocon-associated protein subunit beta
O15031	PLXNB2	1049	1000	R.EAESLQPMTVVGTDYVFHN#DTK.V	3.095	-1.01	828.72	3	Y	Y	Plexin-B2
O75882	ATRN	428	1000	R.VFHIHN#ESWVLLTPK.A	4.234	-1	608.329	3	Y	N	Attractin
Q6UWV6	ENPP7	168	37.54	K.EGIAHNYKN#ETEWR.A	3.568	-0.99	875.407	2	N	Y	Ectonucleotide pyrophosphatase/phosphodieste
P78504	JAG1	217	7.971	R.DDFFGHYACDQNGN#KTCMEGWMGPECNR.A	3.317	-0.95	850.577	4	N	Y	Protein jagged-1
Q2VWP7	PRTG	630	1000	K.SPELHLEPLN#CTTISVR.W	2.564	-0.95	657.002	3	N	Y	Protogenin
O15230	LAMA5	95	1000	K.LVGGPVAGGDPN#QTIR.G	3.704	-0.93	777.411	2	N	Y	Laminin subunit alpha-5
P21860	ERBB3	566	1000	R.EFAHEAECFSCHPECQPMEGTATCN#GSGSDTCAQCAHFR.D	3.554	-0.91	908.147	5	Y	Y	Receptor tyrosine-protein kinase erbB-3
Q07954	LRP1	729	1000	R.LYWVDAFYDRIETILLN#GTDR.K	3.178	-0.91	859.435	3	N	Y	Prolow-density lipoprotein receptor-related p
P07858	CTSB	192	1000	K.GLVSGGLYESHVGCRPYSIPPCEHHVN#GSRPPCTGEGDTPK.C	3.522	-0.89	893.614	5	Y	N	Cathepsin B
Q86SQ4	GPR126	818	1000	K.SFGGWN#TSGCVAHR.D	3.845	-0.89	769.837	2	Y	Y	G-protein coupled receptor 126
Q68D85	NCR3LG1	216	1000	K.LN#SSQEDPGTVYQCVVR.H	4.39	-0.89	977.956	2	Y	Y	Natural cytotoxicity triggering receptor 3 ligand 1
Q9Y639	NPTN	171	1000	R.IVTSEEVIIRDSPVLPVTLQCN#LTSSSHTLTYSYWTK.N	4.202	-0.89	1061.04	4	Y	N	Neuroplastin
P05556	ITGB1	481	1000	K.CHEGN#GTFECGACR.C	3.678	-0.87	829.305	2	Y	Y	Integrin beta-1
Q92859	NEO1	470	1000	R.TPASDPHGDN#LTYSVFYTK.E	2.545	-0.87	705.996	3	N	Y	Neogenin
Q14517	FAT1	998	1000	K.KQVYN#LTVR.A	2.467	-0.86	562.321	2	Y	Y	Protocadherin Fat 1
Q86XX4	FRAS1	728	1000	K.SPHN#CTDCGPSHVLLDGQCLSQCPDGYFHQEGSCTECHPTCR.Q	2.454	-0.85	828.166	6	N	Y	Extracellular matrix protein FRAS1
O00567	NOP56	207	30.835	K.IINDN#ATYCR.L	2.5	-0.85	621.787	2	N	Y	Nucleolar protein 56
Q92673	SORL1	674	103.137	R.TPHATCFNGEDFDRPVVVSN#CSCTR.E	4.68	-0.83	733.069	4	Y	Y	Sortilin-related receptor
Q99523	SORT1	98	19.843	K.LAN#NTHQHVFDDLR.G	2.612	-0.83	561.609	3	N	Y	Sortilin
P42892	ECE1	166	1000	K.HLLEN#STASVSEAERK.A	4.116	-0.82	591.966	3	Y	Y	Endothelin-converting enzyme 1
Q9BTY2	FUCA2	377	1000	R.SQN#DTVTPDVWYTSKPK.E	2.2	-0.82	656.985	3	Y	Y	Plasma alpha-L-fucosidase
P56199	ITGA1	840	44.278	R.SQNDKFN#VSLTVK.N	2.915	-0.82	741.887	2	Y	Y	Integrin alpha-1
Q15043	SLC39A14	77	1000	R.GN#VTQHVQGHR.N	2.036	-0.82	618.309	2	Y	Y	Zinc transporter ZIP14
Q8NFZ8	CADM4	262	37.54	R.WNRGN#ESLPER.A	2.13	-0.8	680.828	2	Y	N	Cell adhesion molecule 4
P11047	LAMC1	1108	6.591	R.LQRVNN#TLSSQISR.L	3.58	-0.8	540.296	3	Y	N	Laminin subunit gamma-1
P08962	CD63	150	1000	K.CCGAAN#YTDWEK.I	3.648	-0.79	739.283	2	Y	Y	CD63 antigen
P32004	L1CAM	203	36.447	R.VTMGQNGNLYFANVLTSDN#HSDYICHAHFPGTR.T	3.418	-0.77	748.743	5	Y	N	Neural cell adhesion molecule L1
P15586	GNS	279	13.936	K.TPMTN#SSIQFLDNAFRK.R	2.343	-0.76	658.327	3	N	Y	N-acetylglucosamine-6-sulfatase
P48960	CD97	33	3.359	R.WCPQN#SSCVNATACR.C	1.796	-0.75	907.368	2	N	Y	CD97 antigen
O15230	LAMA5	2019	104.477	R.CEICAPGFYGNALLPGN#CTR.C	4.576	-0.71	1137	2	Y	Y	Laminin subunit alpha-5
O75051	PLXNA2	655	121.36	K.FYN#CSAHQLCLSCVNSAFR.C	2.964	-0.71	779.674	3	Y	Y	Plexin-A2
Q6YHK3	CD109	419	1000	K.IN#YTVPQSGTFK.I	2.551	-0.7	679.347	2	Y	N	CD109 antigen
P56199	ITGA1	532	1000	K.VYVYALN#QTR.F	2.707	-0.7	615.324	2	Y	Y	Integrin alpha-1
O75096	LRP4	719	50.04	R.CGDNNGGCTHLCLPSGQN#YTCACPTGFRK.I	4.759	-0.7	827.093	4	Y	Y	Low-density lipoprotein receptor-related protein 4
Q13510	ASAH1	259	1000	R.TVLEN#STSYEEAK.N	2.265	-0.69	737.345	2	N	Y	Acid ceramidase
P13688	CEACAM1	153	5.75	K.SDLVNEEATGQFHVYPELPKPSISSNN#SNPVEDK.D	4.024	-0.69	936.949	4	N	Y	Carcinoembryonic antigen-related cell adhesi
P13688	CEACAM1	378	104.477	K.LSQGN#TTLSINPVK.R	3.713	-0.69	737.903	2	Y	Y	Carcinoembryonic antigen-related cell adhesion molecule 1
P61978	HNRNPK	73	1000	R.TDYN#ASVSVPDSSGPER.I	2.43	-0.69	892.396	2	Y	Y	Heterogeneous nuclear ribonucleoprotein K
Q8NHP8	PLBD2	515	37.54	R.SDLNPAN#GSYPFQALR.Q	3.449	-0.69	876.925	2	N	Y	Putative phospholipase B-like 2
Q12913	PTPRJ	391	1000	K.VSDN#ESSSN#YTYK.I	3.751	-0.69	750.311	2	N	Y	Receptor-type tyrosine-protein phosphatase e
Q12913	PTPRJ	396	1000	K.VSDN#ESSSN#YTYK.I	3.751	-0.69	750.311	2	N	Y	Receptor-type tyrosine-protein phosphatase e
Q13433	SLC39A6	266	146.622	R.NTNENPQECFN#ASK.L	4.285	-0.69	828.346	2	Y	N	Zinc transporter ZIP6
Q14517	FAT1	4152	39.947	R.CQSDIDECSGNPCLHGALCENTHGSYHCN#CSHEYR.G	4.952	-0.68	846.326	5	Y	N	Protocadherin Fat 1
Q12913	PTPRJ	231	6.591	K.AALSWSNGN#GTASCR.V	3.393	-0.68	777.846	2	N	Y	Receptor-type tyrosine-protein phosphatase e
Q9HCN3	TMEM8A	535	1000	R.GWSCTDN#STAQTVAQQR.A	4.994	-0.68	956.92	2	Y	Y	Transmembrane protein 8A
P11279	LAMP1	103	1000	R.GHTLTLN#FTR.N	1.952	-0.67	581.808	2	Y	Y	Lysosome-associated membrane glycoprotein 1
Q8TEM1	NUP210	681	1000	K.FFQN#VTAEDTDSIGLALFAPHSSR.N	3.047	-0.67	876.093	3	Y	N	Nuclear pore membrane glycoprotein 210
Q15293	RCN1	53	1000	K.ERVVRPDSELGERPPEDN#QSFQYDHEAFLGK.E	3.449	-0.67	730.35	5	Y	Y	Reticulocalbin-1
P02751	FN1	542	1000	K.RHEEGHMLN#CTCFGQGR.G	4.785	-0.65	697.964	3	Y	Y	Fibronectin
Q9Y4L1	HYOU1	155	1000	R.QTVHFQISSQLQFSPEEVLGM*VLN#YSR.S	3.776	-0.65	1052.86	3	Y	Y	Hypoxia up-regulated protein 1
Q8WTV0	SCARB1	106	27.13	R.HKSNITFN#N#NDTVSFLEYR.T	2.844	-0.65	577.027	4	N	Y	Scavenger receptor class B member 1
Q8WTV0	SCARB1	107	5.085	R.HKSNITFN#N#NDTVSFLEYR.T	2.844	-0.65	577.027	4	N	Y	Scavenger receptor class B member 1
O00468	AGRN	932	1000	R.CVEESGSAHCVCPMLTCPEAN#ATK.V	5.452	-0.64	904.375	3	Y	Y	Agrin
P18084	ITGB5	654	1000	K.RDCVECLLLHSGKPDN#QTCHSLCR.D	3.676	-0.64	592.472	5	Y	Y	Integrin beta-5
O75882	ATRN	416	24.243	K.IDSTGN#VTNELR.V	2.643	-0.63	661.327	2	Y	Y	Attractin
Q6YHK3	CD109	118	1000	R.TQDEILFSN#STR.L	2.567	-0.63	707.34	2	Y	Y	CD109 antigen
Q8N6C5	IGSF1	798	1000	R.VTFN#CSTPHQHMSFILYK.D	4.962	-0.63	1107.02	2	Y	Y	Immunoglobulin superfamily member 1
P08195	SLC3A2	365	1000	K.DASSFLAEWQN#ITK.G	2.715	-0.59	806.89	2	N	Y	4F2 cell-surface antigen heavy chain
P54709	ATP1B3	124	1000	K.N#LTVCPDGALFEQK.G	3.612	-0.58	797.887	2	Y	Y	Sodium/potassium-transporting ATPase subunit beta-3
P15529	CD46	83	1000	K.KGYFYIPPLATHTICDRN#HTWLPVSDDACYR.E	4.798	-0.58	943.199	4	Y	Y	Membrane cofactor protein
P05107	ITGB2	212	9.34	K.LTN#NSNQFQTEVGK.Q	3.264	-0.58	791.883	2	Y	N	Integrin beta-2
Q6NSJ0	KIAA1161	511	1000	R.VGYQSQN#ISCFFR.L	2.783	-0.58	804.871	2	N	Y	Uncharacterized family 31 glucosidase KIAA11
P11142	HSPA8	151	71.949	K.TVTNAVVTVPAYFN#DSQR.Q	3.592	-0.57	992.996	2	Y	Y	Heat shock cognate 71 kDa protein
Q96GP6	SCARF2	310	1000	R.CLTCEPGWN#GTK.C	3.022	-0.57	713.304	2	N	Y	Scavenger receptor class F member 2
Q6YHK3	CD109	513	62.715	K.QN#STMFSLTPENSWTPK.A	3.453	-0.56	985.956	2	N	Y	CD109 antigen
P11047	LAMC1	1395	93.154	K.IPAIN#QTITEANEK.T	3.499	-0.56	772.906	2	Y	Y	Laminin subunit gamma-1
Q92542	NCSTN	612	1000	K.DLYEYSWVQGPLHSN#ETDRLPR.C	2.638	-0.56	893.429	3	N	Y	Nicastrin
Q07954	LRP1	1575	1000	K.DN#TTCYEFKK.F	2.494	-0.54	654.786	2	Y	Y	Prolow-density lipoprotein receptor-related protein 1
P40925	MDH1	26	1000	R.VLVTGAAGQIAYSLLYSIGN#GSVFGK.D	3.064	-0.54	863.466	3	Y	N	Malate dehydrogenase, cytoplasmic
O15031	PLXNB2	1099	1000	R.TEAGAFEYVPDPTFEN#FTGGVKK.Q	2.921	-0.54	836.4	3	Y	Y	Plexin-B2
Q8WTV0	SCARB1	108	30.612	R.HKSNITFN#NN#DTVSFLEYR.T	4.125	-0.54	769.033	3	Y	Y	Scavenger receptor class B member 1
Q92673	SORL1	1246	1000	R.CPN#GTCIPSSK.H	1.799	-0.54	612.267	2	Y	Y	Sortilin-related receptor
Q9UHN6	TMEM2	739	71.806	K.TTN#SSAADPREYLCLDNSAR.F	3.279	-0.54	748.674	3	Y	Y	Transmembrane protein 2
P21860	ERBB3	616	11.791	K.YPDVQNECRPCHEN#CTQGCK.G	2.901	-0.52	639.506	4	Y	Y	Receptor tyrosine-protein kinase erbB-3
P05556	ITGB1	669	1000	K.KDTCTQECSYFN#ITK.V	3.289	-0.52	633.278	3	Y	Y	Integrin beta-1
Q07954	LRP1	2905	1000	K.CN#ASSQFLCSSGR.C	3.846	-0.52	738.808	2	Y	Y	Prolow-density lipoprotein receptor-related protein 1
Q13087	PDIA2	284	30.687	R.ILNHLLLFVN#QTLAAHR.E	3.866	-0.52	659.382	3	Y	N	Protein disulfide-isomerase A2
Q9UBV2	SEL1L	431	1000	K.MYSEGSDIVPQSN#ETALHYFK.K	2.626	-0.52	807.038	3	Y	Y	Protein sel-1 homolog 1
P23229	ITGA6	930	33.657	K.EINSLN#LTESHNSRK.K	2.862	-0.51	872.939	2	Y	Y	Integrin alpha-6
Q6PJF5	RHBDF2	584	1000	R.SN#HTGFLHMDCEIK.G	3.61	-0.51	423.69	4	Y	Y	Inactive rhomboid protein 2
Q92484	SMPDL3A	263	1000	K.VYIIAHVPVGYLPSSQN#ITAMR.E	3.172	-0.51	811.434	3	Y	N	Acid sphingomyelinase-like phosphodiesterase 3a
Q9Y5L3	ENTPD2	443	16.964	K.KAADTAVGWALGYMLN#LTNLIPADPPGLRK.G	3.836	-0.5	793.179	4	Y	Y	Ectonucleoside triphosphate diphosphohydrolase 2
P58166	INHBE	198	1000	K.LQLDCRPLEGN#STVTGQPR.R	3.159	-0.5	715.36	3	Y	N	Inhibin beta E chain
P01130	LDLR	657	132.875	R.LTGSDVNLLAENLLSPEDMVLFHN#LTQPR.G	4.379	-0.49	1080.55	3	Y	Y	Low-density lipoprotein receptor
Q9H0U3	MAGT1	71	1000	K.APPRN#YSVIVMFTALQLHR.Q	3.331	-0.49	554.803	4	Y	Y	Magnesium transporter protein 1
Q92542	NCSTN	387	1000	R.TSLELWMHTDPVSQKN#ESVR.N	4.633	-0.49	787.386	3	Y	Y	Nicastrin
Q8N441	FGFRL1	293	1000	K.RVEYGAEGRHN#STIDVGGQK.F	2.963	-0.48	544.771	4	Y	Y	Fibroblast growth factor receptor-like 1
Q9P0K1	ADAM22	519	64.757	R.EAVNDCDIRETCSGN#SSQCAPNIHK.M	4.413	-0.47	955.74	3	Y	Y	Disintegrin and metalloproteinase domain-containing protein 22
P02749	APOH	253	1000	K.LGN#WSAMPSCK.A	2.891	-0.47	627.28	2	Y	Y	Beta-2-glycoprotein 1
Q9H0X4	ITFG3	389	1000	R.YKPDTLAVAVEN#GTGTDR.Q	3.217	-0.47	637.317	3	N	Y	Protein ITFG3
P13473	LAMP2	101	1000	K.IAVQFGPGFSWIAN#FTK.A	4.396	-0.47	943.49	2	Y	Y	Lysosome-associated membrane glycoprotein 2
Q07954	LRP1	3333	1000	R.TCVSN#CTASQFVCK.N	4.207	-0.47	832.851	2	Y	Y	Prolow-density lipoprotein receptor-related protein 1
P08581	MET	106	1000	K.AN#LSGGVWK.D	2.215	-0.46	467.747	2	Y	N	Hepatocyte growth factor receptor
Q15223	PVRL1	286	33.968	K.ADANPPATEYHWTTLN#GSLPK.G	2.504	-0.45	762.702	3	Y	N	Poliovirus receptor-related protein 1
P50895	BCAM	377	1000	K.VLSLPLN#SSAVVN#CSVHGLPTPALR.W	2.522	-0.44	869.803	3	Y	Y	Basal cell adhesion molecule
P50895	BCAM	383	1000	K.VLSLPLN#SSAVVN#CSVHGLPTPALR.W	2.522	-0.44	869.803	3	Y	Y	Basal cell adhesion molecule
P98160	HSPG2	3072	33.747	K.TRNQELEDNVHISPN#GSIITIVGTRPSNHGTYR.C	2.605	-0.44	736.575	5	N	Y	Basement membrane-specific heparan sulfate pr
P17181	IFNAR1	81	1000	K.LSGCQN#ITSTK.C	2.788	-0.44	606.294	2	Y	Y	Interferon alpha/beta receptor 1
P35613	BSG	302	38.238	R.SELHIENLNMEADPGQYRCN#GTSSK.G	3.063	-0.43	951.76	3	N	Y	Basigin
Q9BY67	CADM1	113	1000	K.VSLTN#VSISDEGR.Y	3.206	-0.43	690.348	2	Y	Y	Cell adhesion molecule 1
O95297	MPZL1	50	1000	K.EIFVAN#GTQGK.L	1.983	-0.43	583.8	2	N	Y	Myelin protein zero-like protein 1
Q14126	DSG2	182	150.768	K.IN#ATDADEPNTLNSK.I	4.898	-0.41	803.378	2	Y	Y	Desmoglein-2
O15230	LAMA5	2423	1000	R.DN#ATLQATLHAAR.D	2.163	-0.41	462.24	3	Y	Y	Laminin subunit alpha-5
P02771	AFP	251	1000	K.VN#FTEIQK.L	2.592	-0.4	491.26	2	Y	N	Alpha-fetoprotein
P04004	VTN	86	0	K.NN#ATVHEQVGGPSLTSDLQAQSK.G	2.815	-0.4	795.39	3	Y	N	Vitronectin
O95477	ABCA1	489	53.534	R.EAFN#ETNQAIR.T	3.408	-0.39	648.309	2	Y	Y	ATP-binding cassette sub-family A member 1
Q9BYF1	ACE2	546	1000	K.CDISN#STEAGQK.L	2.163	-0.39	656.782	2	N	Y	Angiotensin-converting enzyme 2
Q9BY67	CADM1	301	2.185	R.VDDEMPQHAVLSGPNLFIN#N#LNKTDNGTYR.C	3.923	-0.39	845.406	4	N	Y	Cell adhesion molecule 1
P11047	LAMC1	1107	24.437	R.VN#NTLSSQISR.L	3.474	-0.39	611.319	2	Y	Y	Laminin subunit gamma-1
P13473	LAMP2	257	44.278	K.VASVININPN#TTHSTGSCR.S	2.831	-0.39	677.665	3	Y	Y	Lysosome-associated membrane glycoprotein 2
Q6EMK4	VASN	117	1000	R.LHEITN#ETFR.G	2.226	-0.39	631.816	2	Y	N	Vasorin
P56199	ITGA1	418	34.073	R.N#TTFNVESTK.K	2.155	-0.38	572.274	2	N	Y	Integrin alpha-1
P23229	ITGA6	323	1000	R.AN#HSGAVVLLK.R	3.01	-0.38	556.321	2	Y	Y	Integrin alpha-6
O75509	TNFRSF21	82	1000	K.CPAGTYVSEHCTN#TSLR.V	2.847	-0.38	652.62	3	Y	Y	Tumor necrosis factor receptor superfamily member 21
P48509	CD151	160	4.54	K.RYHQPGHEAVTSAVDQLQQEFHCCGSNN#SQDWRDSEWIR.S	4.024	-0.37	947.021	5	Y	Y	CD151 antigen
P27487	DPP4	685	21.671	R.YM*GLPTPEDNLDHYRN#STVMSR.A	3.178	-0.37	654.549	4	Y	Y	Dipeptidyl peptidase 4
Q9UJ14	GGT7	267	1000	K.GLHEAHQLYGRLPWSQVLAFAAAVAQDGFN#VTHDLAR.A	3.454	-0.37	813.218	5	Y	Y	Gamma-glutamyltransferase 7
P18084	ITGB5	586	44.278	K.CHAGYIGDNCN#CSTDISTCR.G	5.718	-0.37	788.638	3	Y	Y	Integrin beta-5
P21860	ERBB3	250	1000	R.HFN#DSGACVPR.C	2.757	-0.36	631.777	2	Y	Y	Receptor tyrosine-protein kinase erbB-3
Q92896	GLG1	210	1000	K.GYMVSCLVDHRGN#ITEYQCHQYITK.M	3.651	-0.36	769.605	4	Y	Y	Golgi apparatus protein 1
O95490	LPHN2	731	1000	R.SLGQFLSTEN#ATIK.L	3.821	-0.36	756.395	2	Y	N	Latrophilin-2
Q9Y639	NPTN	284	71.067	K.ENGM*PMDIVN#TSGR.F	2.413	-0.36	770.337	2	Y	Y	Neuroplastin
Q8WTV0	SCARB1	102	58.551	R.HKSN#ITFNNN#DTVSFLEYR.T	4.591	-0.36	769.033	3	Y	Y	Scavenger receptor class B member 1
Q24JP5	TMEM132A	71	1000	R.VQQVGHYPPAN#SSLSSR.S	2.329	-0.36	610.639	3	N	Y	Transmembrane protein 132A
Q14517	FAT1	1551	31.935	R.IVVN#VSDTNDHAPWFTASSYK.G	2.495	-0.35	785.377	3	Y	N	Protocadherin Fat 1
Q12891	HYAL2	103	1000	R.SVHGGVPQN#VSLWAHR.K	2.969	-0.35	437.478	4	N	Y	Hyaluronidase-2
P48960	CD97	371	1000	R.GDKN#VTMGQSSAR.M	2.523	-0.34	451.882	3	N	Y	CD97 antigen
Q07954	LRP1	2486	36.655	R.INN#GGCQDLCLLTHQGHVN#CSCR.G	2.934	-0.34	680.545	4	Y	Y	Prolow-density lipoprotein receptor-related protein 1
P04114	APOB	1523	58.551	R.FN#SSYLQGTNQITGR.Y	2.749	-0.33	844.91	2	Y	N	Apolipoprotein B-100
Q8N6C5	IGSF1	747	1000	R.MEDKDEGN#YSCR.T	3.272	-0.33	502.862	3	N	Y	Immunoglobulin superfamily member 1
Q9UMR5	PPT2	60	1000	R.HLLEYIN#ETHPGTVVTVLDLFDGRESLRPLWEQVQGFR.E	3.498	-0.33	894.265	5	N	Y	Lysosomal thioesterase PPT2
Q9Y4L1	HYOU1	922	1000	K.DKN#GTRAEPPLN#ASASDQGEK.V	3.54	-0.32	731.013	3	Y	Y	Hypoxia up-regulated protein 1
P42892	ECE1	651	84.609	K.RQTECMVEQYSN#YSVNGEPVNGR.H	4.443	-0.31	907.402	3	Y	Y	Endothelin-converting enzyme 1
P02751	FN1	430	16.062	R.GGNSNGALCHFPFLYNNHN#YTDCTSEGR.R	2.92	-0.3	802.09	4	Y	Y	Fibronectin
A6NKT7	RGPD3	432	54.237	R.AHN#GSLQHLTWLGLQWNSLPALPGIRK.W	4.293	-0.3	753.412	4	Y	Y	RanBP2-like and GRIP domain-containing prote
P04004	VTN	85	12.218	K.N#NATVHEQVGGPSLTSDLQAQSK.G	3.363	-0.3	795.39	3	N	Y	Vitronectin
P07307	ASGR2	102	1000	K.EAFSN#FSSSTLTEVQAISTHGGSVGDK.I	3.79	-0.29	920.434	3	Y	Y	Asialoglycoprotein receptor 2
P40189	IL6ST	379	1000	K.SHLQN#YTVN#ATK.L	3.204	-0.28	691.34	2	Y	Y	Interleukin-6 receptor subunit beta
P40189	IL6ST	383	1000	K.SHLQN#YTVN#ATK.L	3.204	-0.28	691.34	2	Y	Y	Interleukin-6 receptor subunit beta
P23229	ITGA6	768	4.085	K.QLSCVAN#QNGSQADCELGNPFKR.N	3.603	-0.28	866.063	3	Y	N	Integrin alpha-6
Q92823	NRCAM	858	51.004	R.VNVVN#STLAEVHWDPVPLK.S	3.046	-0.28	707.38	3	Y	Y	Neuronal cell adhesion molecule
P07942	LAMB1	502	48.854	K.RLVTGQHCDQCLPEHWGLSN#DLDGCRPCDCDLGGALNNSCFAESGQCSCRPHMIGR.Q	4.019	-0.27	1089.8	6	Y	Y	Laminin subunit beta-1
Q8WWI5	SLC44A1	180	1000	R.CAPVN#ISCYAK.F	2.349	-0.27	643.294	2	Y	N	Choline transporter-like protein 1
Q9NV96	TMEM30A	294	71.067	R.YSLN#VTYNYPVHYFDGR.K	3.156	-0.27	704.33	3	Y	Y	Cell cycle control protein 50A
Q07954	LRP1	2502	58.564	R.INN#GGCQDLCLLTHQGHVN#CSCR.G	4.278	-0.26	680.545	4	Y	Y	Prolow-density lipoprotein receptor-related p
P78536	ADAM17	539	1000	K.KCQEAIN#ATCK.G	3.239	-0.25	663.307	2	N	Y	Disintegrin and metalloproteinase domain-con
P15144	ANPEP	128	1000	K.KLN#YTLSQGHR.V	3.829	-0.25	440.57	3	Y	Y	Aminopeptidase N
P42892	ECE1	251	13.38	K.NSNSN#VIQVDQSGLGLPSRDYYLN#KTENEK.V	4.696	-0.25	847.912	4	Y	N	Endothelin-converting enzyme 1
P42892	ECE1	270	27.121	K.NSNSN#VIQVDQSGLGLPSRDYYLN#KTENEK.V	4.696	-0.25	847.912	4	Y	Y	Endothelin-converting enzyme 1
P08887	IL6R	93	1000	R.SVQLHDSGN#YSCYR.A	2.481	-0.25	563.579	3	Y	Y	Interleukin-6 receptor subunit alpha
O43490	PROM1	274	17.009	K.EALENMN#STLK.S	2.151	-0.25	626.802	2	Y	Y	Prominin-1
Q06418	TYRO3	240	1000	K.LSSSN#ASVAWMPGADGR.A	3.478	-0.25	854.896	2	Y	N	Tyrosine-protein kinase receptor TYRO3
P05362	ICAM1	183	1000	R.RDHHGAN#FSCR.T	2.334	-0.24	453.867	3	Y	Y	Intercellular adhesion molecule 1
P06213	INSR	325	23.624	K.CIPECPSGYTMNSSN#LLCTPCLGPCPK.V	3.786	-0.24	1039.44	3	N	Y	Insulin receptor
O15031	PLXNB2	127	1000	R.ALSN#ISLR.L	2.177	-0.24	438.755	2	Y	N	Plexin-B2
P48960	CD97	453	17.009	R.RLSAVNSIFLSHN#NTK.E	3.39	-0.23	601.991	3	Y	N	CD97 antigen
P05362	ICAM1	267	78.156	R.LNPTVTYGN#DSFSAK.A	3.292	-0.23	808.888	2	Y	Y	Intercellular adhesion molecule 1
P11717	IGF2R	2136	49.59	R.AACAVKPQEVQMVN#GTITNPIN#GK.S	4.211	-0.23	849.429	3	Y	Y	Cation-independent mannose-6-phosphate receptor
P06213	INSR	282	1000	R.CVN#FSFCQDLHHK.C	2.423	-0.23	424.438	4	Y	Y	Insulin receptor
P06213	INSR	698	1000	R.TWSPPFESEDSQKHN#QSEYEDSAGECCSCPK.T	3.392	-0.23	920.616	4	Y	Y	Insulin receptor
P56199	ITGA1	341	1000	K.HFFN#VSDELALVTIVK.T	3.414	-0.23	612.333	3	Y	N	Integrin alpha-1
P17301	ITGA2	1057	1000	R.TASCSN#VTCWLK.D	2.105	-0.23	715.32	2	Y	Y	Integrin alpha-2
P32004	L1CAM	876	1000	K.DHVVVPAN#TTSVILSGLRPYSSYHLEVQAFN#GR.G	3.467	-0.23	908.967	4	Y	N	Neural cell adhesion molecule L1
P32004	L1CAM	899	1000	K.DHVVVPAN#TTSVILSGLRPYSSYHLEVQAFN#GR.G	3.467	-0.23	908.967	4	Y	N	Neural cell adhesion molecule L1
Q15043	SLC39A14	67	17.361	K.ALLN#HLDVGVGRGNVTQHVQGHRN#LSTCFSSGDLFTAHN#FSEQSR.I	4.693	-0.23	829.569	6	Y	Y	Zinc transporter ZIP14
P11387	TOP1	593	1000	R.TYN#ASITLQQQLK.E	2.771	-0.23	755.903	2	N	Y	DNA topoisomerase 1
P10909	CLU	374	1000	R.LAN#LTQGEDQYYLR.V	3.941	-0.22	843.914	2	Y	Y	Clusterin
Q13308	PTK7	283	1000	R.RATVFAN#GSLLLTQVRPR.N	4.638	-0.22	668.053	3	Y	Y	Inactive tyrosine-protein kinase 7
Q86XX4	FRAS1	2563	1000	K.YTSYN#VSEK.A	2.201	-0.21	547.25	2	N	Y	Extracellular matrix protein FRAS1
O14495	PPAP2B	170	19.843	R.LRPHFLSVCNPDFSQIN#CSEGYIQNYR.C	3.963	-0.21	830.139	4	N	Y	Lipid phosphate phosphohydrolase 3
P15144	ANPEP	265	31.275	K.GPSTPLPEDPNWN#VTEFHTTPK.M	4.274	-0.2	823.06	3	Y	Y	Aminopeptidase N
Q9BYE9	CDHR2	632	48.091	R.LLFNLLPGPYSHN#FSLDPDTGLLR.N	2.753	-0.2	901.474	3	N	Y	Cadherin-related family member 2
Q86XX4	FRAS1	1504	21.351	K.IVYN#ITLPLHPNQGIIEHR.D	2.347	-0.2	558.311	4	Y	N	Extracellular matrix protein FRAS1
P05556	ITGB1	212	155.51	K.LRNPCTSEQN#CTSPFSYK.N	4.602	-0.2	731.326	3	Y	Y	Integrin beta-1
P32004	L1CAM	979	1000	R.THN#LTDLSPHLR.Y	3.505	-0.2	469.581	3	Y	Y	Neural cell adhesion molecule L1
O15230	LAMA5	2196	1000	R.GIN#ASSMAWAR.L	2.626	-0.2	583.779	2	Y	N	Laminin subunit alpha-5
Q29983	MICA	125	1000	R.VCEIHEDN#STR.S	3.006	-0.2	681.796	2	Y	N	MHC class I polypeptide-related sequence A
Q9UN76	SLC6A14	174	122.185	R.SPIVTHCN#VSTVNK.G	4.226	-0.2	779.892	2	Y	Y	Sodium- and chloride-dependent neutral and b
O00468	AGRN	135	88.444	K.NELMLN#SSLMR.I	2.939	-0.19	655.82	2	Y	Y	Agrin
P07307	ASGR2	170	1000	R.FVACQMELLHSN#GSQR.T	1.865	-0.19	627.294	3	Y	Y	Asialoglycoprotein receptor 2
P04066	FUCA1	268	15.779	R.WGQN#CSCHHGGYYNCEDK.F	2.694	-0.19	569.462	4	N	Y	Tissue alpha-L-fucosidase
P05981	HPN	112	1000	R.TAGAN#GTSGFFCVDEGRLPHTQR.L	2.539	-0.19	621.042	4	N	Y	Serine protease hepsin
P56199	ITGA1	883	17.009	K.DSCESNHN#ITCK.V	2.189	-0.19	734.29	2	Y	Y	Integrin alpha-1
P32004	L1CAM	479	1000	K.AFGAPVPSVQWLDEDGTTVLQDERFFPYAN#GTLGIR.D	2.942	-0.19	1323.99	3	Y	Y	Neural cell adhesion molecule L1
Q07954	LRP1	1511	1000	K.WTGHN#VTVVQR.T	3.694	-0.19	433.894	3	Y	Y	Prolow-density lipoprotein receptor-related protein 1
Q29983	MICA	220	1000	R.SEASEGN#ITVTCR.A	3.401	-0.18	713.822	2	Y	Y	MHC class I polypeptide-related sequence A
Q96AQ6	PBXIP1	455	71.949	K.LQGLENWGQDPGVSAN#ASK.A	4.029	-0.18	987.476	2	Y	N	Pre-B-cell leukemia transcription factor-interacting protein 1
P78536	ADAM17	452	1000	K.MFSN#CSK.Q	1.8	-0.17	438.677	2	N	Y	Disintegrin and metalloproteinase domain-con
Q6YHK3	CD109	247	1000	K.HLN#GTITAK.Y	1.672	-0.17	479.266	2	Y	Y	CD109 antigen
P11717	IGF2R	581	1000	K.TN#ITLVCKPGDLESAPVLR.T	2.58	-0.17	696.041	3	Y	Y	Cation-independent mannose-6-phosphate receptor
O60487	MPZL2	39	1000	R.VLEAVN#GTDAR.L	3.423	-0.17	574.296	2	Y	Y	Myelin protein zero-like protein 2
Q13308	PTK7	175	1000	R.DGTPLSDGQSN#HTVSSK.E	3.777	-0.17	866.897	2	N	Y	Inactive tyrosine-protein kinase 7
Q13586	STIM1	171	1000	R.LAVTN#TTMTGTVLK.M	3.73	-0.17	726.897	2	Y	N	Stromal interaction molecule 1
Q9BVK6	TMED9	125	1000	R.FTFTSHTPGEHQICLHSN#STK.F	3.161	-0.17	608.785	4	Y	Y	Transmembrane emp24 domain-containing protein 9
Q32P28	LEPRE1	540	1000	K.VPLQSAHLYYN#VTEK.V	2.529	-0.16	588.973	3	Y	N	Prolyl 3-hydroxylase 1
O15031	PLXNB2	759	1000	K.LHVTLYN#CSFGR.S	2.675	-0.16	735.358	2	Y	Y	Plexin-B2
P08648	ITGA5	297	1000	K.GN#LTYGYVTILN#GSDIR.S	4.064	-0.15	931.469	2	Y	N	Integrin alpha-5
P08648	ITGA5	307	1000	K.GN#LTYGYVTILN#GSDIR.S	4.064	-0.15	931.469	2	Y	N	Integrin alpha-5
Q07954	LRP1	2127	1000	K.RGSKDN#ATDSVPLR.T	2.832	-0.15	759.891	2	Y	Y	Prolow-density lipoprotein receptor-related protein 1
O75326	SEMA7A	157	15.007	R.HPSCWNLVN#GTVVPLGEM*R.G	2.511	-0.15	729.019	3	N	Y	Semaphorin-7A
P30825	SLC7A1	226	148.399	K.NWQLTEEDFGN#TSGR.L	4.134	-0.15	878.886	2	Y	Y	High affinity cationic amino acid transporter 1
P46977	STT3A	548	24.437	R.TILVDNNTWN#NTHISR.V	4.608	-0.15	950.973	2	Y	Y	Dolichyl-diphosphooligosaccharide--protein glycosyltransferase subunit STT3A
P14625	HSP90B1	217	12.218	K.HNN#DTQHIWESDSNEFSVIADPR.G	4.913	-0.14	905.404	3	Y	Y	Endoplasmin
P14625	HSP90B1	445	1000	K.GVVDSDDLPLN#VSR.E	3.002	-0.14	744.875	2	Y	Y	Endoplasmin
O15230	LAMA5	2303	1000	R.TLSELMSQTGHLGLAN#ASAPSGEQLLR.T	4.758	-0.14	928.807	3	Y	Y	Laminin subunit alpha-5
P07602	PSAP	101	1000	K.TCDWLPKPN#MSASCK.E	3.054	-0.14	599.933	3	N	Y	Prosaposin
P01009	SERPINA1	73	10.095	R.QLAHQSNSTN#IFFSPVSIATAFAMLSLGTK.A	4.544	-0.14	1062.21	3	Y	N	Alpha-1-antitrypsin
P35613	BSG	160	1000	K.ILLTCSLN#DSATEVTGHR.W	3.136	-0.13	663.998	3	Y	Y	Basigin
Q9BY67	CADM1	101	1000	R.FQLLN#FSSSELK.V	2.889	-0.13	708.369	2	N	Y	Cell adhesion molecule 1
P27487	DPP4	520	1000	K.KLDFIILN#ETK.F	4.419	-0.13	668.884	2	Y	Y	Dipeptidyl peptidase 4
P56199	ITGA1	100	1000	K.LDLPVN#TSIPN#VTEVK.E	3.881	-0.13	872.971	2	Y	Y	Integrin alpha-1
P56199	ITGA1	105	1000	K.LDLPVN#TSIPN#VTEVK.E	3.881	-0.13	872.971	2	N	Y	Integrin alpha-1
P56199	ITGA1	1113	195.415	R.SEN#ASLVLSSSNQK.R	4.157	-0.13	733.864	2	Y	Y	Integrin alpha-1
P61009	SPCS3	139	7.71	K.GN#RNVTLTLSWNVVPNAGILPLVTGSGHVSVPFPDTYEITK.S	3.385	-0.13	1092.33	4	Y	N	Signal peptidase complex subunit 3
P02786	TFRC	723	24.437	K.QNN#GAFN#ETLFR.N	2.811	-0.13	708.83	2	Y	Y	Transferrin receptor protein 1
P02786	TFRC	727	51.004	K.QNN#GAFN#ETLFR.N	2.811	-0.13	708.83	2	Y	Y	Transferrin receptor protein 1
Q9C0H2	TTYH3	144	1000	R.VWDTAVGLN#HTAEPSLQTLER.Q	3.634	-0.13	780.729	3	N	Y	Protein tweety homolog 3
P10909	CLU	291	1000	R.EIRHN#STGCLR.M	1.815	-0.12	449.222	3	Y	Y	Clusterin
P01892	HLA-A	110	1000	R.GYYN#QSEAGSHTVQR.M	2.354	-0.12	567.257	3	Y	N	HLA class I histocompatibility antigen, A-2 alpha chain
P05362	ICAM1	145	1000	R.AN#LTVVLLRGEK.E	1.899	-0.12	439.266	3	N	Y	Intercellular adhesion molecule 1
P32004	L1CAM	931	1000	R.GSGPASEFTFSTPEGVPGHPEALHLECQSN#TSLLLR.W	3.507	-0.12	957.212	4	N	Y	Neural cell adhesion molecule L1
Q13308	PTK7	405	1000	R.RQDVN#ITVATVPSWLK.K	3.692	-0.12	915.504	2	N	Y	Inactive tyrosine-protein kinase 7
P26640	VARS	345	20.565	R.GVFM*M*CIPPPN#VTGSLHLGHALTNAIQDSLTR.W	3.663	-0.12	871.433	4	N	Y	Valine--tRNA ligase
P02749	APOH	162	30.835	R.VYKPSAGN#NSLYR.D	3.051	-0.11	491.252	3	Y	Y	Beta-2-glycoprotein 1
P06213	INSR	322	7.971	K.CIPECPSGYTMN#SSNLLCTPCLGPCPK.V	3.551	-0.11	1039.45	3	N	Y	Insulin receptor
P05556	ITGB1	50	20.625	K.SCGECIQAGPNCGWCTN#STFLQEGMPTSAR.C	3.89	-0.11	1127.13	3	Y	Y	Integrin beta-1
Q9UHN6	TMEM2	980	1000	R.HPSCVN#VSK.W	2.541	-0.1	515.747	2	N	Y	Transmembrane protein 2
Q8NBJ5	COLGALT1	381	1000	K.AM*N#TSQVEALGIQM*LPGYR.D	3.618	-0.09	705.343	3	Y	N	Procollagen galactosyltransferase 1
Q9UJ14	GGT7	586	4.085	R.GLSGLTQVLLNVLTLNRN#LSDSLAR.G	4.113	-0.09	890.839	3	N	Y	Gamma-glutamyltransferase 7
P56199	ITGA1	460	1000	R.YN#HTGQVIIYR.M	2.28	-0.09	456.238	3	N	Y	Integrin alpha-1
Q9Y4D7	PLXND1	155	1000	R.RRGN#ISAVAVR.F	2.603	-0.09	401.238	3	Y	N	Plexin-D1
Q08380	LGALS3BP	125	1000	R.DAGVVCTN#ETR.S	2.243	-0.08	612.774	2	Y	Y	Galectin-3-binding protein
Q12866	MERTK	442	1000	K.ELLEEVGQN#GSR.A	3.013	-0.08	667.328	2	Y	Y	Tyrosine-protein kinase Mer
Q7KYR7	BTN2A1	114	1000	R.GSVALVIHN#ITAQEN#GTYR.C	3.689	-0.07	683.684	3	Y	Y	Butyrophilin subfamily 2 member A1
Q7KYR7	BTN2A1	120	1000	R.GSVALVIHN#ITAQEN#GTYR.C	3.689	-0.07	683.684	3	Y	Y	Butyrophilin subfamily 2 member A1
P01892	HLA-A	124	1000	R.GYYN#QSEAGSHTVQR.M	2.032	-0.07	567.257	3	N	Y	HLA class I histocompatibility antigen, A-2 a
Q68D85	NCR3LG1	242	1000	R.SN#FTLTAAR.H	2.227	-0.07	492.256	2	N	Y	Natural cytotoxicity triggering receptor 3 l
O15118	NPC1	1064	1000	R.LIASN#VTETM*GIN#GSAYR.V	4.598	-0.07	959.963	2	Y	N	Niemann-Pick C1 protein
O15118	NPC1	1072	1000	R.LIASN#VTETM*GIN#GSAYR.V	4.598	-0.07	959.963	2	Y	N	Niemann-Pick C1 protein
O75751	SLC22A3	72	1000	R.CGWSPEEEWN#RTAPASR.G	2.083	-0.07	679.299	3	N	Y	Solute carrier family 22 member 3
Q8N6C5	IGSF1	1223	1000	K.GIGN#YSCSYR.L	2.132	-0.06	590.253	2	Y	Y	Immunoglobulin superfamily member 1
Q6NSJ0	KIAA1161	396	0	R.VTLWVHPFVN#YNSSR.F	4.292	-0.06	911.462	2	N	Y	Uncharacterized family 31 glucosidase KIAA11
Q08380	LGALS3BP	69	1000	R.ALGFEN#ATQALGR.A	3.26	-0.06	675.848	2	Y	Y	Galectin-3-binding protein
Q07954	LRP1	3048	100.207	K.LNLDGSN#YTLLK.Q	2.575	-0.05	677.361	2	Y	Y	Prolow-density lipoprotein receptor-related protein 1
Q04771	ACVR1	102	5.085	K.TPPSPGQAVECCQGDWCNRN#ITAQLPTK.G	3.086	-0.04	1063.49	3	N	Y	Activin receptor type-1
Q10589	BST2	65	1000	R.AVMECRN#VTHLLQQELTEAQK.G	2.66	-0.04	626.065	4	Y	Y	Bone marrow stromal antigen 2
O75144	ICOSLG	102	1000	R.LFN#VTPQDEQK.F	2.758	-0.03	661.33	2	Y	Y	ICOS ligand
Q14517	FAT1	1940	1000	K.TGALTVQN#TTQLR.S	3.608	-0.02	703.38	2	Y	Y	Protocadherin Fat 1
P32004	L1CAM	671	1000	K.VPGN#QTSTTLK.L	2.237	-0.02	574.806	2	Y	Y	Neural cell adhesion molecule L1
P43121	MCAM	56	1000	K.CGLSQSQGN#LSHVDWFSVHK.E	3.79	-0.02	763.692	3	Y	Y	Cell surface glycoprotein MUC18
Q8WWI5	SLC44A1	135	71.692	K.FAEIN#GSALCSYNLKPSEYTTSPK.S	3.735	-0.02	894.095	3	Y	Y	Choline transporter-like protein 1
P78504	JAG1	1045	1000	K.RDGN#SSLIAAVAEVR.V	3.03	-0.01	520.946	3	N	Y	Protein jagged-1
Q15262	PTPRK	462	99.973	K.APQHVVNHLPPYTN#VSLK.M	3.945	-0.01	505.024	4	N	Y	Receptor-type tyrosine-protein phosphatase k
Q9BX74	TM2D1	96	49.097	K.DSSGN#ETHFTGNEVGFFKPISCR.N	5.135	-0.01	863.724	3	Y	Y	TM2 domain-containing protein 1
O95477	ABCA1	478	1000	K.HPEDVQSSN#GSVYTWR.E	3.634	0	622.283	3	Y	Y	ATP-binding cassette sub-family A member 1
Q9NRM6	IL17RB	103	1000	R.CN#YTEAFQTQTRPSGGK.W	3.514	0	974.441	2	Y	Y	Interleukin-17 receptor B
P06756	ITGAV	74	1000	K.AN#TTQPGIVEGGQVLK.C	3.787	0	807.933	2	Y	Y	Integrin alpha-V
P05534	HLA-A	134	1000	R.YYN#QSEAGSHTLQMMFGCDVGSDGR.F	4.606	0.01	938.388	3	N	Y	HLA class I histocompatibility antigen, A-24
P17301	ITGA2	1074	1000	K.GEYFVN#VTTR.I	2.411	0.01	594.793	2	Y	N	Integrin alpha-2
Q07954	LRP1	446	1000	R.FN#STEYQVVTR.V	3.033	0.01	673.827	2	Y	Y	Prolow-density lipoprotein receptor-related protein 1
P01011	SERPINA3	93	139.476	K.NVIFSPLSISTALAFLSLGAHN#TTLTEILK.G	3.335	0.01	1058.92	3	Y	Y	Alpha-1-antichymotrypsin
O43556	SGCE	200	73.311	R.LNAIN#ITSALDR.G	2.583	0.01	652.359	2	N	Y	Epsilon-sarcoglycan
P22413	ENPP1	341	1000	K.MYN#GSVPFEER.I	2.576	0.02	666.295	2	N	Y	Ectonucleotide pyrophosphatase/phosphodieste
Q29983	MICA	289	1000	R.FTCYM*EHSGN#HSTHPVPSGK.V	2.536	0.02	764.661	3	Y	Y	MHC class I polypeptide-related sequence A
Q9NTN9	SEMA4G	111	6.591	K.GKNN#QTECFNHVR.F	2.348	0.02	536.247	3	Y	Y	Semaphorin-4G
P0C0L4	C4A	1328	1000	R.GLN#VTLSSTGR.N	2.711	0.03	554.298	2	Y	N	Complement C4-A
O00220	TNFRSF10A	156	2.017	R.CTEGVGYTN#ASNNLFACLPCTACK.S	4.576	0.03	904.387	3	N	Y	Tumor necrosis factor receptor superfamily m
P25445	FAS	136	66.993	R.CKPNFFCN#STVCEHCDPCTK.C	2.974	0.04	641.756	4	N	Y	Tumor necrosis factor receptor superfamily me
O15230	LAMA5	3107	1000	K.RLN#TTGVSAGCTADLLVGR.A	4.278	0.04	982.509	2	Y	Y	Laminin subunit alpha-5
Q9UHG3	PCYOX1	323	101.329	K.MSN#ITFLNFDPPIEEFHQYYQHIVTTLVK.G	3.089	0.04	882.692	4	Y	Y	Prenylcysteine oxidase 1
Q86SQ4	GPR126	324	76.733	K.ILSN#LSCNVK.G	3.436	0.06	575.805	2	Y	Y	G-protein coupled receptor 126
P05556	ITGB1	520	55.461	R.KEN#SSEICSNNGECVCGQCVCRK.R	2.842	0.06	695.287	4	Y	Y	Integrin beta-1
P11279	LAMP1	84	1000	R.SSCGKEN#TSDPSLVIAFGR.G	5.115	0.06	1014.48	2	Y	Y	Lysosome-associated membrane glycoprotein 1
P13473	LAMP2	179	43.066	K.NDVVQHYWDVLVQAFVQN#GTVSTNEFLCDK.D	6.463	0.06	1176.89	3	Y	N	Lysosome-associated membrane glycoprotein 2
O15031	PLXNB2	391	58.699	R.GGLN#LTAVTVAAEN#NHTVAFLGTSDGR.I	2.682	0.07	897.783	3	N	Y	Plexin-B2
P23470	PTPRG	156	106.199	K.VEFHWGHSN#GSAGSEHSINGR.R	4.934	0.07	756.674	3	N	Y	Receptor-type tyrosine-protein phosphatase g
Q9UGH3	SLC23A2	436	49.097	R.GIFVEGLSCVLDGIFGTGN#GSTSSSPNIGVLGITK.V	4.529	0.07	1152.92	3	N	Y	Solute carrier family 23 member 2
O75882	ATRN	1073	1000	K.CIN#QSICEK.C	2.395	0.08	577.757	2	Y	Y	Attractin
O75882	ATRN	300	1000	R.GICN#SSDVR.G	2.295	0.09	505.727	2	N	Y	Attractin
P06213	INSR	651	15.007	K.WKPPSDPNGN#ITHYLVFWER.Q	2.507	0.09	615.556	4	Y	Y	Insulin receptor
P11047	LAMC1	1205	132.105	K.TAN#DTSTEAYNLLLR.T	4.521	0.09	842.917	2	Y	Y	Laminin subunit gamma-1
Q07954	LRP1	3839	24.437	R.FGTCSQLCN#NTK.G	3.18	0.09	716.808	2	Y	Y	Prolow-density lipoprotein receptor-related protein 1
P42892	ECE1	210	1000	R.LGGWN#ITGPWAK.D	2.622	0.1	651.84	2	Y	N	Endothelin-converting enzyme 1
P35052	GPC1	116	1000	R.SFDDHFQHLLN#DSER.T	3.844	0.1	931.913	2	Y	N	Glypican-1
P08069	IGF1R	747	1000	R.DVMQVAN#TTMSSR.S	3.053	0.1	721.829	2	N	Y	Insulin-like growth factor 1 receptor
P27487	DPP4	150	30.835	K.RQLITEERIPN#NTQWVTWSPVGHK.L	4.572	0.11	964.838	3	Y	Y	Dipeptidyl peptidase 4
Q02487	DSC2	392	1000	R.AN#YTILK.G	2.864	0.11	413.234	2	Y	Y	Desmocollin-2
Q96AY3	FKBP10	393	1000	R.TLSRPSETCN#ETTK.L	3.316	0.11	813.88	2	Y	N	Peptidyl-prolyl cis-trans isomerase FKBP10
Q86XX4	FRAS1	1093	59.367	K.SGLCVYNCVPGFSVHTSN#ETCSGK.I	3.387	0.11	888.386	3	Y	Y	Extracellular matrix protein FRAS1
P98160	HSPG2	3836	1000	R.IQGEEIVFHDLN#LTAHGISHCPTCR.D	2.676	0.11	727.6	4	N	Y	Basement membrane-specific heparan sulfate pr
P40189	IL6ST	227	8.043	K.VKPNPPHN#LSVINSEELSSILK.L	3.049	0.11	605.334	4	N	Y	Interleukin-6 receptor subunit beta
P40189	IL6ST	390	37.54	K.LTVN#LTNDR.Y	2.171	0.11	524.78	2	N	Y	Interleukin-6 receptor subunit beta
Q07954	LRP1	3788	1000	K.LTSCATN#ASICGDEAR.C	4.181	0.11	864.874	2	Y	Y	Prolow-density lipoprotein receptor-related protein 1
P02763	ORM1	93	51.004	R.QDQCIYN#TTYLNVQR.E	3.981	0.11	959.946	2	Y	Y	Alpha-1-acid glycoprotein 1
O43157	PLXNB1	1253	1000	K.YTLDPN#ITSAGPTK.S	3.4	0.11	740.875	2	Y	Y	Plexin-B1
P15144	ANPEP	735	1.115	K.QVTPLFIHFRN#NTNNWR.E	2.53	0.13	540.78	4	Y	N	Aminopeptidase N
Q9Y5L3	ENTPD2	64	27.086	K.WPADKEN#DTGIVGQHSSCDVPGGGISSYADNPSGASQSLVGCLEQALQDVPK.E	4.297	0.13	1351.12	4	Y	N	Ectonucleoside triphosphate diphosphohydrolase 2
P17301	ITGA2	343	1000	R.YFFN#VSDEAALLEK.A	4.59	0.13	824.903	2	Y	Y	Integrin alpha-2
P06756	ITGAV	874	1000	K.ISSLQTTEKN#DTVAGQGER.D	2.862	0.13	679.671	3	Y	N	Integrin alpha-V
O15031	PLXNB2	528	1000	K.SCVAVTSAQPQN#MSR.R	3.993	0.13	819.877	2	Y	Y	Plexin-B2
P28827	PTPRM	131	44.278	K.VNNGPLGNPIWN#ISGDPTR.T	3.402	0.13	1012.51	2	Y	Y	Receptor-type tyrosine-protein phosphatase m
O75792	RNASEH2A	134	27.376	K.YNLNSLSHDTATGLIQYALDQGVN#VTQVFVDTVGM*PETYQAR.L	4.377	0.13	1162.82	4	N	Y	Ribonuclease H2 subunit A
P05026	ATP1B1	193	1000	R.VLGFKPKPPKN#ESLETYPVM*K.Y	3.135	0.14	606.08	4	Y	Y	Sodium/potassium-transporting ATPase subunit beta-1
P04626	ERBB2	530	1000	R.GHCWGPGPTQCVN#CSQFLR.G	3.254	0.14	755.328	3	Y	Y	Receptor tyrosine-protein kinase erbB-2
P51654	GPC3	241	46.129	R.IFLQALNLGIEVIN#TTDHLK.F	4.493	0.14	752.423	3	Y	Y	Glypican-3
Q15165	PON2	254	17.009	K.HTNMN#LTQLK.V	2.199	0.14	601.808	2	Y	Y	Serum paraoxonase/arylesterase 2
O00220	TNFRSF10A	159	6.591	R.CTEGVGYTNASN#NLFACLPCTACK.S	4.73	0.14	904.387	3	Y	N	Tumor necrosis factor receptor superfamily member 10A
P11717	IGF2R	1757	1000	K.HFN#YTSLIAFHCK.R	3.667	0.15	547.597	3	Y	N	Cation-independent mannose-6-phosphate receptor
P18084	ITGB5	552	1000	K.IYGPFCECDN#FSCAR.N	3.674	0.15	949.873	2	Y	Y	Integrin beta-5
Q15758	SLC1A5	212	1000	R.SYSTTYEERN#ITGTR.V	2.291	0.15	594.279	3	N	Y	Neutral amino acid transporter B(0)
Q9HDC9	APMAP	160	1000	R.AGPN#GTLFVADAYK.G	3.397	0.16	713.859	2	Y	Y	Adipocyte plasma membrane-associated protein
Q15904	ATP6AP1	261	1000	K.QPVSPVIHPPVSYN#DTAPR.I	2.563	0.16	693.025	3	N	Y	V-type proton ATPase subunit S1
Q96AP7	ESAM	169	1000	R.LQGVPHVGAN#VTLSCQSPR.S	4.007	0.16	675.014	3	Y	Y	Endothelial cell-selective adhesion molecule
O95490	LPHN2	520	93.154	K.GPDLSN#CTSHWVNQLAQK.I	4.786	0.16	1029.48	2	Y	N	Latrophilin-2
Q8NBJ5	COLGALT1	96	33.657	R.TALWVATDHNMDN#TSTVLR.E	3.964	0.17	716.681	3	Y	Y	Procollagen galactosyltransferase 1
O00461	GOLIM4	257	70.47	R.KPDPAEQQN#VTQVAHSPQGYNTAR.E	3.27	0.17	660.573	4	Y	N	Golgi integral membrane protein 4
P07686	HEXB	327	59.298	K.LDSFGPINPTLN#TTYSFLTTFFK.E	5.17	0.18	1314.16	2	Y	Y	Beta-hexosaminidase subunit beta
P05362	ICAM1	202	1000	R.TELDLRPQGLELFEN#TSAPYQLQTFVLPATPPQLVSPR.V	3.289	0.18	1068.06	4	Y	Y	Intercellular adhesion molecule 1
P07942	LAMB1	1279	1000	K.LSDTTSQSN#STAK.E	2.396	0.18	671.815	2	N	Y	Laminin subunit beta-1
P08195	SLC3A2	395	52.599	R.LLIAGTNSSDLQQILSLLESN#KDLLLTSSYLSDSGSTGEHTK.S	5.235	0.18	1113.82	4	Y	N	4F2 cell-surface antigen heavy chain
P35613	BSG	268	1000	K.ALMN#GSESR.F	1.939	0.19	484.224	2	Y	Y	Basigin
Q8N8Z6	DCBLD1	277	1000	R.ASSSWQSVN#ESGDQVHWSPGQAR.L	3.36	0.19	835.042	3	Y	Y	Discoidin, CUB and LCCL domain-containing protein 1
P06756	ITGAV	945	30.835	K.ENQN#HSYSLK.S	1.702	0.19	611.783	2	N	Y	Integrin alpha-V
P45877	PPIC	142	82.279	K.HYGIGWVSMANAGPDTN#GSQFFITLTKPTWLDGK.H	2.994	0.19	928.955	4	Y	N	Peptidyl-prolyl cis-trans isomerase C
Q7Z7H5	TMED4	117	1000	R.FTFTSHTPGDHQICLHSN#STR.M	3.117	0.19	612.283	4	Y	Y	Transmembrane emp24 domain-containing protein 4
P10253	GAA	470	1000	R.GVFITN#ETGQPLIGK.V	3.082	0.2	788.927	2	N	Y	Lysosomal alpha-glucosidase
Q07954	LRP1	4364	1000	K.QSGDVTCN#CTDGR.V	1.957	0.2	736.785	2	N	Y	Prolow-density lipoprotein receptor-related p
Q9H8Y8	GORASP2	44	1000	R.AGLEPFFDFIVSIN#GSR.L	2.956	0.21	624.652	3	Y	Y	Golgi reassembly-stacking protein 2
P06213	INSR	242	1000	K.SHGCTAEGLCCHSECLGN#CSQPDDPTK.C	2.248	0.21	770.8	4	Y	Y	Insulin receptor
P62937	PPIA	108	59.298	K.HTGPGILSMANAGPNTN#GSQFFICTAK.T	5.67	0.21	932.111	3	Y	Y	Peptidyl-prolyl cis-trans isomerase A
Q8NFZ8	CADM4	67	1000	R.QTLFFN#GTR.A	1.942	0.23	543.777	2	Y	Y	Cell adhesion molecule 4
Q7LGA3	HS2ST1	108	1000	K.YHVLHIN#TTK.N	3.108	0.23	410.224	3	N	Y	Heparan sulfate 2-O-sulfotransferase 1
P14625	HSP90B1	62	1000	R.TDDEVVQREEEAIQLDGLN#ASQIR.E	4.83	0.23	911.114	3	Y	N	Endoplasmin
O15230	LAMA5	2209	1000	R.LN#ASIADLQSQLR.S	3.031	0.25	716.388	2	Y	Y	Laminin subunit alpha-5
P42892	ECE1	539	1000	R.FFN#FSWR.V	2.272	0.26	503.737	2	N	Y	Endothelin-converting enzyme 1
P06213	INSR	445	1000	K.HN#LTITQGK.L	1.896	0.27	507.777	2	Y	Y	Insulin receptor
Q12913	PTPRJ	342	1000	R.YN#ATVYSQAAN#GTEGQPQAIEFR.T	4.634	0.27	841.059	3	Y	Y	Receptor-type tyrosine-protein phosphatase eta
Q12913	PTPRJ	351	1000	R.YN#ATVYSQAAN#GTEGQPQAIEFR.T	4.634	0.27	841.059	3	Y	Y	Receptor-type tyrosine-protein phosphatase eta
Q8WTV0	SCARB1	317	16.144	K.TLFANGSIYPPN#EGFCPCLESGIQN#VSTCR.F	3.695	0.27	1132.18	3	Y	N	Scavenger receptor class B member 1
Q8WTV0	SCARB1	330	47.506	K.TLFANGSIYPPN#EGFCPCLESGIQN#VSTCR.F	3.695	0.27	1132.18	3	Y	N	Scavenger receptor class B member 1
P04626	ERBB2	571	1000	R.HCLPCHPECQPQN#GSVTCFGPEADQCVACAHYK.D	3.354	0.28	784.324	5	Y	Y	Receptor tyrosine-protein kinase erbB-2
O00754	MAN2B1	766	88.626	K.LN#QTEPVAGNYYPVNTR.I	3.143	0.28	969.976	2	Y	Y	Lysosomal alpha-mannosidase
Q9UIW2	PLXNA1	1043	42.869	R.AQLTNPEVKYN#YTEDPTILR.I	3.954	0.28	790.069	3	Y	Y	Plexin-A1
Q14517	FAT1	333	1000	K.AIGGIDWDSHPFGYN#LTLQAK.D	2.629	0.29	769.383	3	Y	Y	Protocadherin Fat 1
P13598	ICAM2	82	1000	K.HYLVSN#ISHDTVLQCHFTCSGK.Q	4.636	0.3	652.306	4	Y	Y	Intercellular adhesion molecule 2
P43307	SSR1	136	57.047	R.YPQDYQFYIQN#FTALPLNTVVPPQR.Q	4.126	0.3	1005.84	3	Y	N	Translocon-associated protein subunit alpha
P42892	ECE1	249	6.591	K.NSN#SNVIQVDQSGLGLPSRDYYLN#KTENEK.V	3.421	0.31	847.913	4	N	Y	Endothelin-converting enzyme 1
Q12866	MERTK	207	1000	K.QPESMN#VTR.N	1.703	0.31	532.75	2	N	Y	Tyrosine-protein kinase Mer
Q9Y653	GPR56	324	1000	K.VAN#LTEPVVLTFQHQLQPK.N	3.15	0.32	722.4	3	N	Y	G-protein coupled receptor 56
Q13308	PTK7	184	14.989	R.N#LTLRPAGPEHSGLYSCCAHSAFGQACSSQNFTLSIADESFAR.V	3.245	0.33	944.433	5	N	Y	Inactive tyrosine-protein kinase 7
P48960	CD97	454	17.009	R.RLSAVNSIFLSHNN#TK.E	3.258	0.34	601.992	3	Y	Y	CD97 antigen
O15031	PLXNB2	844	1000	R.ISVAGRN#CSFQPER.Y	2.61	0.34	541.931	3	Y	Y	Plexin-B2
P08195	SLC3A2	424	76.733	K.SLVTQYLN#ATGNR.W	3.74	0.36	720.373	2	Y	Y	4F2 cell-surface antigen heavy chain
O95479	H6PD	282	122.629	R.TSFYEEYGVIRDVLQNHLTEVLTLVAM*ELPHN#VSSAEAVLR.H	5.751	0.37	1166.35	4	Y	Y	GDH/6PGL endoplasmic bifunctional protein
P11717	IGF2R	2144	48.315	R.AACAVKPQEVQMVN#GTITNPIN#GK.S	3.56	0.37	849.429	3	Y	Y	Cation-independent mannose-6-phosphate recept
P21589	NT5E	311	115.998	K.IEFDERGNVISSHGNPILLN#SSIPEDPSIK.A	5.591	0.37	1094.22	3	Y	Y	5'-nucleotidase
P32969	RPL9	108	85.265	R.SVYAHFPINVVIQEN#GSLVEIR.N	4.125	0.37	829.776	3	Y	N	60S ribosomal protein L9
P21860	ERBB3	353	104.477	R.FQTVDSSNIDGFVN#CTK.I	4.979	0.39	967.938	2	Y	Y	Receptor tyrosine-protein kinase erbB-3
Q99650	OSMR	326	71.067	K.RSVNILFN#LTHR.V	3.445	0.39	491.612	3	N	Y	Oncostatin-M-specific receptor subunit beta
Q86SQ4	GPR126	563	17.009	R.ICFYN#ATNPLVTYWGPVDISNCLK.E	3.485	0.4	1424.68	2	N	Y	G-protein coupled receptor 126
P20645	M6PR	83	182.307	R.EAGN#HTSGAGLVQINK.S	4.045	0.4	799.905	2	Y	Y	Cation-dependent mannose-6-phosphate receptor
Q15262	PTPRK	416	1000	R.RIAVDWESLGYN#ITR.C	3.112	0.41	898.465	2	Y	N	Receptor-type tyrosine-protein phosphatase kappa
Q8NBZ7	UXS1	316	13.208	R.AFQYVSDLVNGLVALMNSN#VSSPVNLGNPEEHTILEFAQLIK.N	3.658	0.41	915.674	5	N	Y	UDP-glucuronic acid decarboxylase 1
Q13308	PTK7	567	127.526	R.DDAGN#YTCIASNGPQGQIR.A	4.197	0.42	1020.45	2	Y	Y	Inactive tyrosine-protein kinase 7
P01009	SERPINA1	271	1000	K.YLGN#ATAIFFLPDEGK.L	2.541	0.42	879.946	2	N	Y	Alpha-1-antitrypsin
P62314	SNRPD1	21	61.423	K.N#GTQVHGTITGVDVSMNTHLK.A	4.07	0.42	738.036	3	Y	Y	Small nuclear ribonucleoprotein Sm D1
P10586	PTPRF	721	1000	R.KVEVEPLN#STAVHVYWK.L	5.165	0.44	668.023	3	Y	Y	Receptor-type tyrosine-protein phosphatase F
P78310	CXADR	106	53.534	K.SGDASIN#VTNLQLSDIGTYQCK.V	5.135	0.45	1194.07	2	Y	Y	Coxsackievirus and adenovirus receptor
P04156	PRNP	197	1000	K.QHTVTTTTKGEN#FTETDVK.M	4.176	0.45	1070.52	2	Y	Y	Major prion protein
Q9Y4D7	PLXND1	583	1000	R.CTLQQDCTN#SSQQHFWTSASEGPSR.C	3.898	0.46	972.412	3	Y	Y	Plexin-D1
O14672	ADAM10	537	116.635	R.EGICN#GFTALCPASDPKPN#FTDCNR.H	4.393	0.47	949.744	3	Y	Y	Disintegrin and metalloproteinase domain-containing protein 10
P50895	BCAM	439	1000	R.TQN#FTLLVQGSPELK.T	4.409	0.47	839.451	2	Y	Y	Basal cell adhesion molecule
P29317	EPHA2	435	1000	R.TASVSIN#QTEPPK.V	2.656	0.47	687.854	2	Y	Y	Ephrin type-A receptor 2
P48960	CD97	38	26.927	R.WCPQNSSCVN#ATACR.C	2.667	0.48	907.369	2	N	Y	CD97 antigen
Q9H8M5	CNNM2	112	0	R.VYGQNINN#ETWSR.I	3.292	0.48	792.371	2	Y	Y	Metal transporter CNNM2
P07858	CTSB	289	50.805	R.ILGWGVEN#GTPYWLVANSWNTDWGDNGFFK.I	5.606	0.49	1149.54	3	Y	Y	Cathepsin B
Q07954	LRP1	4278	23.354	K.CTQQVCAGYCAN#NSTCTVNQGNQPQCR.C	4.199	0.49	1060.43	3	N	Y	Prolow-density lipoprotein receptor-related p
Q92542	NCSTN	562	1000	R.SYLGDGPLQHYIAVSSPTN#TTYVVQYALAN#LTGTVVN#LTR.E	4.595	0.49	1436.07	3	Y	Y	Nicastrin
Q92542	NCSTN	573	1000	R.SYLGDGPLQHYIAVSSPTN#TTYVVQYALAN#LTGTVVN#LTR.E	4.595	0.49	1436.07	3	Y	Y	Nicastrin
Q92542	NCSTN	580	1000	R.SYLGDGPLQHYIAVSSPTN#TTYVVQYALAN#LTGTVVN#LTR.E	4.595	0.49	1436.07	3	Y	Y	Nicastrin
P17301	ITGA2	105	109.943	K.LNLQTSTSIPN#VTEMK.T	3.992	0.5	889.959	2	Y	Y	Integrin alpha-2
Q6P4Q7	CNNM4	127	1000	R.GN#TSGVLVVLTK.F	2.105	0.51	595.848	2	N	Y	Metal transporter CNNM4
P07942	LAMB1	1041	58.699	K.CVCNYLGTVQEHCN#GSDCQCDK.A	4.239	0.52	903.012	3	Y	N	Laminin subunit beta-1
Q86UT6	NLRX1	806	110.548	R.LSNNPLTAAGVAVLMEGLAGN#TSVTHLSLLHTGLGDEGLELLAAQLDR.N	4.483	0.52	1214.64	4	Y	N	NLR family member X1
P08069	IGF1R	900	53.534	R.LNPGN#YTAR.I	1.817	0.53	504.754	2	N	Y	Insulin-like growth factor 1 receptor
P01024	C3	81	2.017	K.TVLTPATN#HM*GNVTFTIPANR.E	3.361	0.54	758.72	3	Y	Y	Complement C3
P48509	CD151	159	27.055	R.YHQPGHEAVTSAVDQLQQEFHCCGSN#NSQDWR.D	5.191	0.54	947.908	4	Y	Y	CD151 antigen
Q12913	PTPRJ	413	76.733	K.IHVAGETDSSNLN#VSEPR.A	3.912	0.57	643.313	3	Y	Y	Receptor-type tyrosine-protein phosphatase e
H3BNX5	ZNF106	219	0	-.MN#NSNGNWKSSVRSTN#N#WNYSGPGDKFQPGR.N	2.007	0.57	702.518	5	N	Y	Zinc finger protein 106 (Fragment)
H3BNX5	ZNF106	233	3.922	-.MN#NSNGNWKSSVRSTN#N#WNYSGPGDKFQPGR.N	2.007	0.57	702.518	5	N	Y	Zinc finger protein 106 (Fragment)
H3BNX5	ZNF106	234	2.185	-.MN#NSNGNWKSSVRSTN#N#WNYSGPGDKFQPGR.N	2.007	0.57	702.518	5	N	Y	Zinc finger protein 106 (Fragment)
Q92887	ABCC2	1011	1000	K.IFN#STDYPASQR.D	2.826	0.58	701.331	2	Y	N	Canalicular multispecific organic anion transporter 1
Q8N8Z6	DCBLD1	64	67.841	K.NYPGTYPN#HTVCEK.T	2.332	0.58	841.872	2	Y	Y	Discoidin, CUB and LCCL domain-containing pr
O15031	PLXNB2	733	1000	K.LSHDAN#ETLPLHLYVK.S	4.029	0.6	463.998	4	Y	Y	Plexin-B2
P54709	ATP1B3	240	12.218	K.LHVGYLQPLVAVQVSFAPN#NTGK.E	5.911	0.63	1228.17	2	Y	Y	Sodium/potassium-transporting ATPase subunit
Q96JJ7	TMX3	258	1000	K.LVALAVIDEKN#TSVEHTR.L	3.44	0.63	666.697	3	Y	N	Protein disulfide-isomerase TMX3
O15031	PLXNB2	795	1000	R.CVYEALCN#TTSECPPPVITR.I	4.09	0.64	790.694	3	Y	Y	Plexin-B2
O95490	LPHN2	744	38.189	R.N#STIAVNSHVISVSINK.E	3.672	0.65	893.484	2	Y	N	Latrophilin-2
Q15262	PTPRK	436	1000	R.GHN#ESKADCLDMDPK.A	2.644	0.65	860.364	2	Y	N	Receptor-type tyrosine-protein phosphatase kappa
P04114	APOB	1368	15.007	K.LYQLQVPLLGVLDLSTNVYSNLYN#WSASYSGGN#TSTDHFSLR.A	4.319	0.66	1175.58	4	Y	Y	Apolipoprotein B-100
P04114	APOB	1377	45.825	K.LYQLQVPLLGVLDLSTNVYSNLYN#WSASYSGGN#TSTDHFSLR.A	4.319	0.66	1175.58	4	N	Y	Apolipoprotein B-100
Q07954	LRP1	4125	1000	K.FGHSPLVN#LTGGLSHASDVVLYHQHK.Q	3.452	0.67	704.865	4	N	Y	Prolow-density lipoprotein receptor-related p
O75096	LRP4	1467	24.437	K.VLIN#NSLDEPR.A	2.376	0.68	636.838	2	N	Y	Low-density lipoprotein receptor-related prot
Q9Y4L1	HYOU1	862	1000	K.VIN#ETWAWK.N	2.456	0.69	575.295	2	N	Y	Hypoxia up-regulated protein 1
P04156	PRNP	181	39.663	R.YPNQVYYRPMDEYSNQNNFVHDCVN#ITIK.Q	5.732	0.75	1208.89	3	Y	N	Major prion protein
Q12913	PTPRJ	824	28.218	R.NTCTTGITDPPPPDGSPN#ITSVSHNSVK.V	4.394	0.75	966.123	3	Y	Y	Receptor-type tyrosine-protein phosphatase eta
Q92673	SORL1	1164	1000	R.SDEYN#CSSGMCIR.S	3.589	0.75	791.297	2	N	Y	Sortilin-related receptor
Q02487	DSC2	546	37.54	K.NGIYN#ITVLASDQGGR.T	3.572	0.76	840.926	2	N	Y	Desmocollin-2
O75882	ATRN	264	53.395	K.ISN#SSDTVECECSENWKGEACDIPHCTDNCGFPHR.G	4.602	0.77	835.136	5	N	Y	Attractin
P23229	ITGA6	966	59.298	K.YQTLN#CSVNVNCVNIR.C	4.292	0.77	978.962	2	Y	Y	Integrin alpha-6
Q29980	MICB	164	24.243	R.AQTLAMN#VTNFWK.E	3.235	0.77	763.882	2	N	Y	MHC class I polypeptide-related sequence B
O75326	SEMA7A	258	18.957	K.IYYFFREDNPDKNPEAPLN#VSR.V	2.028	0.78	672.581	4	N	Y	Semaphorin-7A
P10586	PTPRF	966	127.526	R.DINSQQELQN#ITTDTR.F	4.766	0.79	939.951	2	Y	Y	Receptor-type tyrosine-protein phosphatase F
Q6UWV6	ENPP7	146	1000	R.AGSFFYPGGN#VTYQGVAVTR.S	4.71	0.83	1047.51	2	Y	Y	Ectonucleotide pyrophosphatase/phosphodiesterase family member 7
P36941	LTBR	177	1000	K.AGHFQN#TSSPSAR.C	2.173	0.83	681.818	2	N	Y	Tumor necrosis factor receptor superfamily me
P10646	TFPI	145	9.34	R.YFYNN#QTK.Q	2.092	0.86	540.748	2	N	Y	Tissue factor pathway inhibitor
P54886	ALDH18A1	329	1000	K.AALWALQGGTSVVIAN#GTHPK.V	3.805	0.88	698.713	3	Y	N	Delta-1-pyrroline-5-carboxylate synthase
O75144	ICOSLG	70	71.949	K.TVVTYHIPQN#SSLENVDSR.Y	3.362	0.88	721.359	3	Y	Y	ICOS ligand
Q13308	PTK7	646	1000	R.MHIFQN#GSLVIHDVAPEDSGR.Y	4.188	0.89	775.711	3	Y	Y	Inactive tyrosine-protein kinase 7
P22607	FGFR3	262	1000	R.SPHRPILQAGLPAN#QTAVLGSDVEFHCK.V	4.334	0.9	762.143	4	Y	Y	Fibroblast growth factor receptor 3
P19440	GGT1	511	60.358	R.LHNQLLPN#VTTVER.N	2.806	0.92	546.302	3	N	Y	Gamma-glutamyltranspeptidase 1
P08069	IGF1R	638	45.026	K.WNPPSLPN#GN#LSYYIVR.W	3.037	0.92	998.502	2	Y	N	Insulin-like growth factor 1 receptor
P08069	IGF1R	640	47.045	K.WNPPSLPN#GN#LSYYIVR.W	3.037	0.92	998.502	2	Y	Y	Insulin-like growth factor 1 receptor
P07306	ASGR1	147	1000	R.SLSCQMAALQGN#GSER.T	3.116	0.94	856.386	2	Y	Y	Asialoglycoprotein receptor 1
Q08380	LGALS3BP	580	1000	R.TVIRPFYLTN#SSGVD.-	3.324	0.95	836.428	2	Y	Y	Galectin-3-binding protein
P08195	SLC3A2	381	189.573	R.LLIAGTN#SSDLQQILSLLESNK.D	5.953	0.95	787.432	3	Y	Y	4F2 cell-surface antigen heavy chain
Q92673	SORL1	871	1000	R.LTIVN#SSVLDRPR.A	2.278	0.98	736.92	2	Y	N	Sortilin-related receptor
P30504	HLA-C	110	1000	K.LRGYYN#QSEDGSHTLQR.M	4.201	1	676.321	3	Y	N	HLA class I histocompatibility antigen, Cw-4 alpha chain
P21589	NT5E	333	1000	R.IKLDN#YSTQELGK.T	3.06	1.02	756.396	2	Y	Y	5'-nucleotidase
P19075	TSPAN8	118	104.477	R.IVN#ETLYENTK.L	2.688	1.03	663.838	2	Y	Y	Tetraspanin-8
Q9UIQ6	LNPEP	834	33.657	R.SALLEFACTHNLGN#CSTTAM*K.L	2.919	1.06	782.354	3	Y	Y	Leucyl-cystinyl aminopeptidase
O75976	CPD	811	43.066	R.GILN#ATISVAEINHPVTTYK.T	3.092	1.07	1072.58	2	Y	N	Carboxypeptidase D
Q9GZU7	CTDSP1	228	14.18	R.VLILDNSPASYVFHPDNAVPVASWFDN#MSDTELHDLLPFFEQLSR.V	5.294	1.08	1288.13	4	Y	N	Carboxy-terminal domain RNA polymerase II polypeptide A small phosphatase 1
P05556	ITGB1	44	4.416	K.SCGECIQAGPN#CGWCTNSTFLQEGM*PTSAR.C	3.697	1.14	1132.46	3	N	Y	Integrin beta-1
Q7Z4H8	KDELC2	61	65.44	R.YFYLQAVNSEGQN#LTR.S	5.228	1.14	953.466	2	Y	N	KDEL motif-containing protein 2
O75976	CPD	867	1000	K.SEGAIQVN#FTLVR.S	3.378	1.16	718.886	2	Y	N	Carboxypeptidase D
Q8TEM1	NUP210	1039	1000	R.AASPIITLVALDEALDN#YTITFLIR.G	3.66	1.2	684.88	4	Y	Y	Nuclear pore membrane glycoprotein 210
Q13421	MSLN	496	17.009	R.LAFQNMN#GSEYFVK.I	2.834	1.22	825.891	2	Y	Y	Mesothelin
P15144	ANPEP	234	1000	K.AEFN#ITLIHPK.D	2.443	1.23	643.356	2	N	Y	Aminopeptidase N
P07858	CTSB	38	55.37	K.RN#TTWQAGHNFYNVDMSYLK.R	3.2	1.23	816.715	3	N	Y	Cathepsin B
Q13308	PTK7	116	76.733	R.SAN#ASFNIK.W	2.109	1.23	477.743	2	Y	Y	Inactive tyrosine-protein kinase 7
P25445	FAS	118	1000	R.LCDEGHGLEVEIN#CTR.T	2.641	1.24	635.618	3	N	Y	Tumor necrosis factor receptor superfamily me
P05556	ITGB1	527	30.612	K.ENSSEICSN#N#GECVCGQCVCRK.R	4.532	1.26	885.012	3	Y	Y	Integrin beta-1
P05556	ITGB1	528	34.089	K.ENSSEICSN#N#GECVCGQCVCRK.R	4.532	1.26	885.012	3	Y	Y	Integrin beta-1
P12956	XRCC6	304	1000	R.TFN#TSTGGLLLPSDTK.R	4.33	1.28	827.926	2	N	Y	X-ray repair cross-complementing protein 6
P07942	LAMB1	519	4.54	K.RLVTGQHCDQCLPEHWGLSNDLDGCRPCDCDLGGALN#NSCFAESGQCSCRPHMIGR.Q	3.256	1.3	1089.8	6	Y	N	Laminin subunit beta-1
Q5ZPR3	CD276	104	1000	R.TALFPDLLAQGN#ASLR.L	3.546	1.32	845.458	2	Y	Y	CD276 antigen
Q29983	MICA	261	1000	R.QDGVSLSHDTQQWGDVLPDGN#GTYQTWVATR.I	4.511	1.33	1145.53	3	Y	Y	MHC class I polypeptide-related sequence A
P04222	HLA-C	124	1000	R.GYYN#QSEAGSHIIQR.M	3.423	1.34	863.409	2	N	Y	HLA class I histocompatibility antigen, Cw-3
P08069	IGF1R	244	54.511	K.RACTENNECCHPECLGSCSAPDN#DTACVACR.H	4.765	1.35	919.352	4	Y	Y	Insulin-like growth factor 1 receptor
P19256	CD58	195	33.657	K.IQCTLSNPLFN#TTSSIILTTCIPSSGHSR.H	3.888	1.36	1070.2	3	Y	N	Lymphocyte function-associated antigen 3
Q9UBV2	SEL1L	608	1000	R.EASIVGEN#ETYPR.A	2.629	1.41	734.347	2	Y	N	Protein sel-1 homolog 1
P04626	ERBB2	629	1000	K.FPDEEGACQPCPIN#CTHSCVDLDDKGCPAEQR.A	5.033	1.43	942.138	4	N	Y	Receptor tyrosine-protein kinase erbB-2
Q15043	SLC39A14	87	1000	R.GN#VTQHVQGHRN#LSTCFSSGDLFTAHN#FSEQSR.I	4.499	1.48	932.677	4	Y	Y	Zinc transporter ZIP14
Q15043	SLC39A14	102	1000	R.GN#VTQHVQGHRN#LSTCFSSGDLFTAHN#FSEQSR.I	4.499	1.48	932.677	4	Y	Y	Zinc transporter ZIP14
Q9BU23	LMF2	616	1000	R.SAN#STLAQALHWTR.S	2.991	1.49	520.268	3	Y	N	Lipase maturation factor 2
Q07021	C1QBP	114	1000	K.MSGGWELELN#GTEAK.L	3.137	1.53	812.875	2	N	Y	Complement component 1 Q subcomponent-bindin
P48960	CD97	108	19.846	K.TFKN#ESENTCQDVDECQQNPR.L	5.869	1.62	868.028	3	Y	Y	CD97 antigen
P21860	ERBB3	522	1000	K.VCDPLCSSGGCWGPGPGQCLSCRN#YSR.G	3.025	1.63	1030.76	3	Y	Y	Receptor tyrosine-protein kinase erbB-3
P19022	CDH2	324	6.591	R.IVSQAPSTPSPNMFTIN#NETGDIITVAAGLDREK.V	3.568	1.64	1197.27	3	N	Y	Cadherin-2
P37173	TGFBR2	70	1000	K.SCMSN#CSITSICEKPQEVCVAVWR.K	4.066	1.64	968.763	3	N	Y	TGF-beta receptor type-2
P42785	PRCP	336	54.586	K.NPN#VSDSLLLQNIFQALNVYYN#YSGQVK.C	5.461	1.68	1069.87	3	Y	Y	Lysosomal Pro-X carboxypeptidase
P42892	ECE1	660	64.398	K.RQTECMVEQYSN#YSVNGEPVN#GR.H	4.649	1.7	908.4	3	Y	Y	Endothelin-converting enzyme 1
P32004	L1CAM	247	1000	R.LLFPTN#SSSHLVALQGQPLVLECIAEGFPTPTIK.W	4.71	1.7	1227.66	3	Y	Y	Neural cell adhesion molecule L1
Q8TCJ2	STT3B	627	24.437	R.TTLVDNNTWN#NSHIALVGK.A	4.78	1.72	1050.54	2	Y	Y	Dolichyl-diphosphooligosaccharide--protein g
P23229	ITGA6	997	1000	R.SRLWN#STFLEEYSK.L	2.839	1.74	588.29	3	N	Y	Integrin alpha-6
P30533	LRPAP1	268	1000	R.VIDLWDLAQSAN#LTDK.E	4.624	1.74	902.966	2	Y	Y	Alpha-2-macroglobulin receptor-associated protein
Q07954	LRP1	4279	30.835	K.CTQQVCAGYCANN#STCTVNQGNQPQCR.C	7.201	1.77	1060.43	3	Y	Y	Prolow-density lipoprotein receptor-related protein 1
P05026	ATP1B1	158	100.207	K.LEWLGN#CSGLNDETYGYK.E	5.021	1.78	1061.47	2	Y	Y	Sodium/potassium-transporting ATPase subunit beta-1
Q92484	SMPDL3A	69	5.75	K.GAN#ASNPGPFGDVLCDSPYQLILSAFDFIK.N	3.99	1.82	1072.85	3	Y	N	Acid sphingomyelinase-like phosphodiesterase 3a
Q15223	PVRL1	202	44.278	K.GEAEYQEIRNPN#GTVTVISR.Y	4.221	1.83	746.043	3	Y	Y	Poliovirus receptor-related protein 1
P11047	LAMC1	1161	89.266	K.VAAAN#VSVTQPESTGDPN#NMTLLAEEARK.L	4.574	1.85	1007.16	3	Y	Y	Laminin subunit gamma-1
Q9BV79	MECR	190	9.296	R.M*LMDFEQLQPGDSVIQN#ASNSGVGQAVIQIAAALGLR.T	4.498	1.88	1287.65	3	N	Y	Trans-2-enoyl-CoA reductase, mitochondrial
Q6UXD5	SEZ6L2	247	1000	R.LLAN#SSMLGEGQVLR.S	3.51	1.94	795.925	2	Y	Y	Seizure 6-like protein 2
Q13740	ALCAM	95	65.089	R.LNLSEN#YTLSISNAR.I	3.785	2	849.435	2	Y	N	CD166 antigen
Q9BYF1	ACE2	103	1000	K.LQLQALQQN#GSSVLSEDK.S	3.603	2.02	981.009	2	N	Y	Angiotensin-converting enzyme 2
P10619	CTSA	333	137.202	R.MDPPCTN#TTAASTYLNNPYVR.K	4.861	2.04	1195.04	2	Y	Y	Lysosomal protective protein
P11717	IGF2R	1246	69.812	R.HGNLYDLKPLGLN#DTIVSAGEYTYYFR.V	5.734	2.07	1041.52	3	Y	N	Cation-independent mannose-6-phosphate receptor
Q07954	LRP1	136	1000	R.LGCQHHCVPTLDGPTCYCN#SSFQLQADGK.T	3.411	2.12	839.115	4	Y	Y	Prolow-density lipoprotein receptor-related protein 1
Q6UWV6	ENPP7	100	97.748	K.YIENHGVVHNMYYN#TTSK.V	5.509	2.24	1087	2	Y	Y	Ectonucleotide pyrophosphatase/phosphodiesterase family member 7
P16671	CD36	205	7.71	R.ELLWGYRDPFLSLVPYPVTTTVGLFYPYN#NTADGVYK.V	3.808	2.27	1424.72	3	Y	Y	Platelet glycoprotein 4
Q86SQ4	GPR126	485	7.971	R.LVLWALLVYN#ATNNTN#LEGK.I	2.83	2.27	751.405	3	Y	N	G-protein coupled receptor 126
Q86SQ4	GPR126	491	11.015	R.LVLWALLVYN#ATNNTN#LEGK.I	2.83	2.27	751.405	3	Y	N	G-protein coupled receptor 126
Q13740	ALCAM	167	1000	K.KLGDCISEDSYPDGN#ITWYR.N	3.016	2.29	798.028	3	N	Y	CD166 antigen
Q29980	MICB	261	156.827	R.QDGVSLSHNTQQWGDVLPDGN#GTYQTWVATR.I	5.328	2.3	1145.21	3	Y	Y	MHC class I polypeptide-related sequence B
Q9Y5L3	ENTPD2	294	0	R.GFSTQVLLGDVYQSPCTMAQRPQNFN#SSAR.V	3.839	2.31	1121.53	3	Y	Y	Ectonucleoside triphosphate diphosphohydrolase 2
P06756	ITGAV	615	87.265	R.TAADTTGLQPILNQFTPAN#ISR.Q	4.414	2.36	1166.61	2	Y	Y	Integrin alpha-V
Q15061	WDR43	223	1000	R.HFTGHATPVSSLMFTTIRPPN#ESQPFDGITGLYFLSGAVHDR.L	5.33	2.38	1151.82	4	Y	N	WD repeat-containing protein 43
P28799	GRN	236	1000	K.YGCCPMPN#ATCCSDHLHCCPQDTVCDLIQSK.C	3.435	2.44	947.627	4	Y	Y	Granulins
Q96AP7	ESAM	213	1000	R.GSLSLTN#LSSSMAGVYVCK.A	4.26	2.46	988.984	2	Y	N	Endothelial cell-selective adhesion molecule
Q92673	SORL1	99	27.121	K.VYGQVSLN#DSHNQMVVHWAGEK.S	3.505	2.51	834.399	3	Y	Y	Sortilin-related receptor
P23229	ITGA6	770	20.167	K.QLSCVANQN#GSQADCELGNPFK.R	4.628	2.55	814.032	3	Y	Y	Integrin alpha-6
P16144	ITGB4	695	1000	R.CSFRDEDDDCTYSYTMEGDGAPGPN#STVLVHK.K	5.338	2.64	907.38	4	Y	Y	Integrin beta-4
P43007	SLC1A4	201	1000	K.VVTQN#SSSGN#VTHEK.I	3.151	2.77	796.883	2	Y	Y	Neutral amino acid transporter A
P43007	SLC1A4	206	1000	K.VVTQN#SSSGN#VTHEK.I	3.151	2.77	796.883	2	Y	Y	Neutral amino acid transporter A
Q9Y6M7	SLC4A7	776	15.007	K.LTSYSCVCTEPPNPSN#ETLAQWKK.D	4.038	2.88	938.441	3	Y	Y	Sodium bicarbonate cotransporter 3
P50897	PPT1	232	1000	K.FLN#DSIVDPVDSEWFGFYR.S	4.38	2.89	1155.04	2	N	Y	Palmitoyl-protein thioesterase 1
Q07954	LRP1	1050	50.776	R.CIPEHWTCDGDNDCGDYSDETHAN#CTN#QATRPPGGCHTDEFQCR.L	3.67	2.96	875.338	6	N	Y	Prolow-density lipoprotein receptor-related p
Q07954	LRP1	1053	52.773	R.CIPEHWTCDGDNDCGDYSDETHAN#CTN#QATRPPGGCHTDEFQCR.L	3.67	2.96	875.338	6	N	Y	Prolow-density lipoprotein receptor-related p
P05362	ICAM1	406	53.71	R.LDERDCPGN#WTWPENSQQTPM*CQAWGNPLPELK.C	4.217	2.98	1325.26	3	Y	Y	Intercellular adhesion molecule 1
P0C0S5	H2AFZ	72	1000	R.VGATAAVYSAAILEYLTAEVLELAGN#ASK.D	4.023	3.03	725.388	4	Y	Y	Histone H2A.Z
P04156	PRNP	171	16.062	R.YPNQVYYRPMDEYSN#QNNFVHDCVN#ITIK.Q	5.228	3.33	907.666	4	Y	N	Major prion protein
O75882	ATRN	914	13.38	K.AATCINPLN#GSVCERPAN#HSAK.Q	3.574	3.4	1187.06	2	Y	N	Attractin
O75882	ATRN	923	42.869	K.AATCINPLN#GSVCERPAN#HSAK.Q	3.574	3.4	1187.06	2	Y	N	Attractin
P13688	CEACAM1	345	1000	K.TTVTGDKDSVN#LTCSTN#DTGISIR.W	3.553	3.41	854.408	3	Y	Y	Carcinoembryonic antigen-related cell adhesion molecule 1
P13688	CEACAM1	351	1000	K.TTVTGDKDSVN#LTCSTN#DTGISIR.W	3.553	3.41	854.408	3	Y	Y	Carcinoembryonic antigen-related cell adhesion molecule 1
Q8NBZ7	UXS1	314	9.296	R.AFQYVSDLVNGLVALMN#SNVSSPVNLGNPEEHTILEFAQLIK.N	5.491	3.63	1144.34	4	Y	N	UDP-glucuronic acid decarboxylase 1
Q9NPH2	ISYNA1	187	1000	K.VLDWGLQEQLWPHMEALRPRPSVYIPEFIAAN#QSAR.A	4.81	3.64	1056.05	4	N	Y	Inositol-3-phosphate synthase 1
O14672	ADAM10	551	48.874	R.EGICNGFTALCPASDPKPN#FTDCNR.H	3.753	3.8	1422.62	2	Y	Y	Disintegrin and metalloproteinase domain-con
P12268	IMPDH2	94	39.848	K.TPLVSSPMDTVTEAGMAIAMALTGGIGFIHHN#CTPEFQANEVR.K	6.037	4.1	1144.3	4	N	Y	Inosine-5'-monophosphate dehydrogenase 2
P61513	RPL37A	72	1000	K.TVAGGAWTYN#TTSAVTVK.S	3.819	5.02	915.467	2	Y	N	60S ribosomal protein L37a
Q07954	LRP1	2620	15.227	R.CRDGTCIGN#SSRCN#QFVDCEDASDEMNCSATDCSSYFR.L	1.972	5.26	908.348	5	Y	N	Prolow-density lipoprotein receptor-related protein 1
Q07954	LRP1	2625	14.784	R.CRDGTCIGN#SSRCN#QFVDCEDASDEMNCSATDCSSYFR.L	1.972	5.26	908.348	5	Y	N	Prolow-density lipoprotein receptor-related protein 1
O75629	CREG1	193	42.098	K.LN#ITNIWVLDYFGGPK.I	4.078	5.58	926.995	2	Y	Y	Protein CREG1
P55060	CSE1L	456	55.37	K.HGITQANELVN#LTEFFVNHILPDLK.S	5.158	7.88	955.847	3	N	Y	Exportin-2
Q8IWE2	FAM114A1	533	37.364	K.KAEVLNPM*ISSVLLEGCN#STTYIQDAFQLLLPVLQVSHIQTSCLK.A	6.494	9.02	1270.17	4	N	Y	Protein NOXP20

## Sheet: Description
Column Heading	Description
UniProt name	UniProt symbol of the protein
Gene symbol	Gene symbol for the assigned N-glycoprotein
Site	The N-glycosylation site
ModScore	Score matching the indicated N-glycosylation site
Sequence	Sequence of the N-glycopeptide obtained by ModScore, #-N-glycosylation site; *-methionine oxidation;
XCorr	SEQUEST XCorr
ppm	Mass accuracy of the peptide
Obs m/z	Observed mass-to-charge ratio of the indicated peptide
z	Charge state of the peptide
ID in Expt#1	The site identified in the first experiment
ID in Expt#2	The site identified in the second experiment
Annotation	Description of the protein function
